# Supplementary material for: Effects of train noise and vibration on human heart rate during sleep: an experimental study
Source: PubMed Central journal article supplement — BMJ Open. 2013 May 15;3(5):e002655. doi: 10.1136/bmjopen-2013-002655 (PMC3657678; doi:10.1136/bmjopen-2013-002655), 2013-05-15
Supplement: bmjopen-2013-002655.draft_revisions.pdf [file bmjopen-2013-002655.draft_revisions.pdf]

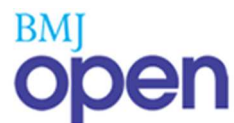

**Adverse effects of train noise and vibration on human heart rate during sleep –an experimental study**

|                                 |                                                                                                                                                                                                                                                                 |
|---------------------------------|-----------------------------------------------------------------------------------------------------------------------------------------------------------------------------------------------------------------------------------------------------------------|
| Journal:                        | <i>BMJ Open</i>                                                                                                                                                                                                                                                 |
| Manuscript ID:                  | bmjopen-2013-002655                                                                                                                                                                                                                                             |
| Article Type:                   | Research                                                                                                                                                                                                                                                        |
| Date Submitted by the Author:   | 30-Jan-2013                                                                                                                                                                                                                                                     |
| Complete List of Authors:       | Croy, Ilona; University of Gothenburg, Occupational and Environmental Medicine<br>Smith, Michael; University of Gothenburg, Occupational and Environmental Medicine<br>Persson Waye, Kerstin; University of Gothenburg, Occupational and Environmental Medicine |
| <b>Primary Subject Heading</b>: | Public health                                                                                                                                                                                                                                                   |
| Secondary Subject Heading:      | Cardiovascular medicine                                                                                                                                                                                                                                         |
| Keywords:                       | Myocardial infarction < CARDIOLOGY, Hypertension < CARDIOLOGY, Audiology < OTOLARYNGOLOGY, PUBLIC HEALTH                                                                                                                                                        |
|                                 |                                                                                                                                                                                                                                                                 |

SCHOLARONE™  
Manuscripts

# Adverse effects of train noise and vibration on human heart rate during sleep –an experimental study

---

**Authors:** Dr. Ilona Croy<sup>1</sup>; Michael Smith<sup>1</sup>,MSc; Prof. Kerstin Persson Wayne<sup>1</sup>

<sup>1</sup>University of Gothenburg, Department of Occupational and Environmental Medicine, University of Gothenburg, Medicinaregatan 16, 405 30 Göteborg, Sweden

**Corresponding author:**

Dr. Ilona Croy  
Occupational and Environmental Medicine  
Medicaregatan 16  
University of Gothenburg  
Box 414, 405 30 Göteborg, Sweden  
+46 (0)31 786 6814  
Ilona.croy@amm.gu.se

**Words:** 3914

**Figures:** 2

**Tables:** 3

**Short title:** Freight train effects on nocturnal heart rate

**Keywords:** train, autonomic arousals, heart rate, noise, sleep, vibration

**Acknowledgements:**

The authors wish to thank the volunteers for participation in the study. We are grateful to Agneta Agge, Mikael Ögren, Sofie Fredriksson and Josefine Larsson for their valuable assistance in conducting the trial. The study was supported by the EU FP7 funded Cargovibes Project.

**Data sharing statement:** Extra data is available by emailing Ilona Croy.

**Financial interests:** None of the authors declare a conflict of interest.

## Abstract

Objectives: Transportation of goods on railways is increasing and the majority of the increased numbers of freight trains run during the night. Transportation noise has adverse effects on sleep structure, affects heart rate during sleep and is linked to cardiovascular disease. Freight trains also generate vibration and little is known regarding the impact of vibration on human sleep. A randomized laboratory study was conducted to examine how a realistic nocturnal railway traffic scenario influences the heart rate (HR) during sleep.

Methods: Twenty four volunteers slept in the laboratory for six consecutive nights: one habituation night, one control and four experimental nights in which train noise and vibration was reproduced. In the experimental nights, 20 or 36 trains with low or high vibration characteristics were presented. Polysomnographical data and ECG were recorded.

Results: The train exposure lead to a significant change of HR within one minute of exposure onset ( $p=0.002$ ), characterized by an initial and a delayed increase of HR. The high vibration condition provoked an average increase of at least 3bpm per train in 79% of the participants. Cardiac responses were in general higher in the high vibration compared to the low vibration condition ( $p=0.006$ ). No significant effect of noise sensitivity and gender was revealed, although there was a tendency for men to exhibit stronger HR acceleration than women.

Conclusions: Freight trains provoke HR accelerations during sleep, and the vibration characteristics of the trains are of special importance. In long term, this may affect cardiovascular functioning of persons living close to railways.

### Article summary

#### Article Focus:

The risk of cardiovascular diseases is higher increased in people living close to railways. This is because noise of bypassing trains affects sleep and induces heart rate accelerations in humans. Trains do not only emit noise, but also vibration and the influence of vibration is poorly understood.

#### Key message:

Our study shows, that freight train noise and vibration provokes heart rate accelerations in sleep. The HR response is characterized by two peaks, whereby the second one is even more pronounced and may dependent on the vibration amplitude.

#### Strengths and limitations:

The influence of nocturnal vibration on HR response has been studied for the first time under very well controlled laboratory conditions. However further studies with increased sample size should be carried out to analyze the influence of gender, age and sensitivity more in detail.

## Introduction

As the European market share of freight traffic is expected to increase from 8% in 2001 to 15% in 2020 [1], it is important to estimate the impact of this on the health of persons living close by to railway lines. Railway noise is related to disturbed sleep [2-6] and there are indications of increased cardiovascular disease in persons living close to railways [7]. There is some research about the impact of traffic noise on sleep and cardiovascular disease, however few have looked into rail traffic and the impact of rail traffic related vibration has been widely neglected.

The impact of other traffic sources like aircraft and road traffic on cardiovascular disease has been examined more closely. Babisch summarizes that traffic exposure enhances the risk for hypertension by between 1.5 to 3 times and enhances the percentage of persons using antihypertensive drugs [8]. Epidemiological studies found an enhanced risk for myocardial infarction in persons exposed to high traffic noise levels, however the effect sizes were rather small. Selander et al examined long term exposure to traffic noise exceeding 50dB  $L_{Aeq,24h}$  and

1  
2  
3 found an increased probability of this occurrence [9]. A similar effect was found by Babisch et al  
4 [10]. They report that the exposure to traffic noise for more than 10 years increased the  
5 likelihood of myocardial infarction in men. However, this effect became only significant at levels  
6 of 70dB or above during daytime. In accordance Grazuleviciene et al report an increased  
7 probability of myocardial infarction in middle aged men in relation to traffic noise [11].  
8 Soerensen et al [12] also found an increased incidence rate ratio in relation to traffic exposure. In  
9 this study too the effect was more pronounced for men. After adjusting their data for confounders  
10 the authors could show that traffic noise increases myocardial infarction risks independently of  
11 air pollution.  
12  
13  
14  
15  
16  
17  
18  
19  
20  
21  
22  
23

24  
25 Disturbed sleep might be one factor leading to enhanced cardiovascular risk in persons exposed  
26 to traffic. It has been suggested that sleep disturbances contribute to cardiovascular disease  
27 through the pathway of enhanced inflammatory processes [13] or, related to this, through the  
28 pathway of enhanced stress reaction affecting the cardiovascular system [14]. Underpinning this,  
29 Portela et al found that patients with sleep-disordered breathing, like sleep apnea, exhibit a higher  
30 risk for cardiovascular diseases [15]. In a field study, Carter et al examined the influence of  
31 nocturnal traffic exposure on 7 older men with cardiac arrhythmia, who lived close to a busy  
32 road [16]. They found an increased likelihood of single ventricular premature contradictions (a  
33 form of cardiac arrhythmia) after noise peaks.  
34  
35  
36  
37  
38  
39  
40  
41  
42  
43  
44  
45  
46

47 Traffic noise influences sleeping structure [17] and leads to increased awakenings [17 18]  
48 throughout the night. People living close to busy roads and railways or in close proximity to  
49 airports therefore often report poor sleep quality [3 4 6]. A Dutch study revealed that the number  
50 of persons reporting strong difficulties falling asleep due to traffic noise increased from 18% to  
51 23% between 1998 and 2003 [19].  
52  
53  
54  
55  
56  
57  
58  
59  
60

1  
2  
3 Two environmental exposures commonly arising from traffic are noise and vibration. As  
4 described, traffic noise disturbs sleep, but the effect of traffic vibration is not well understood.  
5  
6  
7  
8 Studies investigating annoyance show that 1) traffic vibration causes annoyance, 2) annoyance  
9 increases with increasing vibration level and 3) vibration enhances the annoying effect of noise  
10 [20-22]. Furthermore, higher vibration amplitude is related to higher reported sleep disturbances  
11 in persons exposed to railway traffic [6]. A study on human fetuses suggests that short  
12 experimental external vibration exposure alters sleep stage [23]. Some indication that vibration  
13 exposure also influences cardiovascular function comes from working-life studies. Björ et al  
14 showed that persons who were exposed to high vibration during working and leisure time had a  
15 1.6 times enhanced risk of acute myocardial infarction [24]. The coherence between vibration  
16 exposure and cardiovascular disease was supported by a study on mine workers exposed to  
17 whole body vibration [25].  
18  
19  
20  
21  
22  
23  
24  
25  
26  
27  
28  
29  
30  
31

32 The effect of nocturnal train vibration exposure on HR has - to our best knowledge - not been  
33 examined. However, some authors looked into the influence of train noise. Two laboratory  
34 studies on the effect of nocturnal traffic noise on cardiac arousals revealed that HR increases  
35 significantly due to train noise [26 27]. In the study conducted by Griefahn et al [26] 24  
36 participants slept in the laboratory for a total of 12 nights and were exposed to aircraft, railway  
37 and road traffic noise. Resulting HR accelerations, indicating autonomic arousals, to each of  
38 those exposures were revealed. Rail vehicles lead to stronger reactions compared to road or  
39 aircraft noise. Accelerations were especially pronounced if the participants awoke. However, HR  
40 reaction was also very clearly detectable without awakenings. A similar effect has been found by  
41 Tassi et al. [27]. For this study 38 participants slept for three nights in the laboratory and were  
42 exposed to sounds of different types of trains. The same HR acceleration due to traffic noise was  
43 found and mean HR amplitude increased with increasing noise intensity of the trains.  
44  
45  
46  
47  
48  
49  
50  
51  
52  
53  
54  
55  
56  
57  
58  
59  
60

1  
2  
3 As Di Nisi et al found out, traffic exposure induced HR changes seem not to habituate during  
4 sleep [28], therefore they might “bear a pathogenic potential for the genesis of cardiovascular  
5 disease”[26]. It is the aim of the present study to detect if nocturnal noise and vibration exposure  
6 from freight trains provoke HR accelerations.  
7  
8  
9  
10  
11  
12  
13

## 14 **Methods**

### 15 **Participants and procedure**

16  
17  
18  
19  
20 Twenty four volunteers (11 men, 13 women, 19-28 years, mean age 22.9+/- 2.8years) slept in our  
21 sleep laboratory. They were instructed to begin attempting to fall asleep at 23:00 each night,  
22 were awoken by an alarm call at 07:00 each morning, and were prohibited from sleeping outside  
23 of this period. Before attending they were asked about their noise sensitivity on a 5-point Likert  
24 scale. Fourteen participants (8 men, 6 women) rated themselves as being noise insensitive (points  
25 1-2) and 10 rated themselves being highly sensitive (points 3-5). For each participant, the study  
26 consisted of one habituation night, one control night and after this, four experimental nights in  
27 which simulated trains passed. The arrangement of the experimental nights was randomized  
28 across participants. Gender and noise sensitivity were approximately equally spread around the  
29 randomization table. In two of the four experimental nights, the participants were exposed to 20  
30 trains per night with all trains having high vibration one night and low vibration in the other  
31 (High20 and Low20 respectively). In the remaining two nights they were exposed to 36 trains per  
32 night again with either high or low vibrations (High36 and Low36). The acoustic signal for the  
33 trains was not varied with vibration amplitude. There were more train passages between the  
34 periods of 23:00-01:00 and 05:00-07:00 to reflect typical real world scenarios.  
35  
36  
37  
38  
39  
40  
41  
42  
43  
44  
45  
46  
47  
48  
49  
50  
51  
52  
53  
54  
55

56  
57 The sleep laboratory consists of three individual rooms furnished to simulate a typical bedroom  
58 with a bed, chairs, desk and small chest of drawers. Eighty eight ceiling loudspeakers reproduced  
59  
60

1  
2  
3 the low frequency content of noise below 125 Hz, and higher frequencies were generated by two  
4  
5  
6  
7  
8  
9  
10  
11  
12  
13  
14  
15  
16  
17  
18  
19  
20  
21  
22  
23  
24  
25  
26  
27  
28  
29  
30  
31  
32  
33  
34  
35  
36  
37  
38  
39  
40  
41  
42  
43  
44  
45  
46  
47  
48  
49  
50  
51  
52  
53  
54  
55  
56  
57  
58  
59  
60

the low frequency content of noise below 125 Hz, and higher frequencies were generated by two loudspeaker cabinets in the room corners. Because of the unrealistically low background noise levels in the rooms (<14 dBA), for the duration of the trial ventilation noise was introduced at a level of 25 dBA measured at the pillow position on the bed. In addition to the bedrooms the participants have private access to a shared a communal space outfitted with a kitchen, dining area and living area with sofa and television.

Vibration and noise exposure were similar to another study conducted in our laboratory [29] and are only summarized here. Five different train passages were synthesized based upon analysis of accelerometer and sound level measurements performed in the field. Noise signals were high pass filtered to correspond to a fully closed window. The vibration exposure was an amplitude modulated 10 Hz signal applied along the lengthwise horizontal axis of the bed by electrodynamic shakers with a frequency response of 5-40 Hz mounted to the underside of the bed frame. The vibration began when the train noise signal exceeded 35 dB  $L_{Aeq}$ , ensuring masking of any audible mechanical operation noise. Further acoustic and vibration data for each individual train is presented in Table 1.

### Ethics Statement

The study followed the Declaration of Helsinki on Biomedical Research Involving Human Subjects and was approved by the Ethics Committee from the University of Göteborg (920-11). All participants provided written informed consent.

### Cardiac response and polysomnography

During all experimental nights, physiological data was recorded using ambulatory polysomnogram devices (SOMNOscreen plus PSG+, SOMNOmedics GmbH, Germany). Cardiac activity was recorded via a modified lead II torso placement electrocardiogram (ECG) at a sampling frequency of 256 Hz as per the American Academy of Sleep Medicine [30]. To



1  
2  
3 identify sleep stage, electroencephalogram (EEG), electrooculogram (EOG) and submental  
4  
5 electromyogram (EMG) were also recorded using standardized surface electrode placements and  
6  
7 sampling and filter frequencies. To ensure good signal quality, following electrode attachment it  
8  
9 was checked that the electrical impedance of each contact was  $\leq 5\text{k}\Omega$ . Thirty second epoch sleep  
10  
11 staging was performed manually by trained sleep technicians. Additionally, participants wore  
12  
13 two effort belts to record breathing rates and a finger pulse oximeter to record blood oxygen  
14  
15 saturation, plethysmogram and pulse information, although this data shall not be reported here.  
16  
17  
18 Due to a technical fault, ECG was not recorded for one participant (female, noise sensitive) in the  
19  
20 High20 night and so could not be included in analysis.  
21  
22  
23

### 24 25 **Data reduction and event related analysis** 26

27  
28 In order to examine event related changes of HR, data from the four exposure nights was  
29  
30 analyzed. The continuously recorded ECG (sampling frequency of 256Hz) was converted into  
31  
32 HR (in bpm) in 1s intervals through the whole night. EEG and ECG recordings were  
33  
34 synchronized with the train exposure events. This allows a direct temporal association between  
35  
36 the occurrence of a train and the participant's HR reaction and sleep stages. Analysis revealed  
37  
38 that 9.9% of the train onsets occurred during wake stage, 8.1% during stage N1, 42% during  
39  
40 stage N2, 21.4% during stage N3 and 17.8% during REM.  
41  
42  
43

44  
45 The procedure of HR analysis is visualized in figure 1. HRs below 35 and above 130bpm were  
46  
47 considered invalid [26 31] and time intervals where this happened were excluded from the  
48  
49 analysis. This was the case in 4.1% of the events. For analysis of event related HR change (bpm),  
50  
51 only train events where participants were asleep were considered. This approach was chosen  
52  
53 because Griefahn and colleagues showed that HR response to traffic noise differs depending on  
54  
55 whether the participants do or do not awake [26]. The relatively few trains per night in our study  
56  
57 do not allow additional examination of HR response in the case of awakenings. According to the  
58  
59 literature, an event related awakening is defined as a sleep stage change to Wake from any other  
60

1  
2  
3 stage in at least one of the two epochs (30s) following the train onset [32]. The first epoch was  
4  
5 thereby defined as the first where at least 15s were under influence of the event. Additionally,  
6  
7 events for which the participants were awake in the epoch preceding train onset were excluded  
8  
9 from the analysis. The whole procedure left 72.4% of the train events in the low vibration  
10  
11 condition and 66.1% of the train events in the high vibration condition for analysis. In  
12  
13 accordance with the literature, the screening interval for cardiac activations was set to 60s after  
14  
15 train onset [26 31]. In order to analyze change of HR, the average cardiac response of the 10s  
16  
17 preceding the train event was subtracted from the cardiac response in each of the sixty 1s time  
18  
19 intervals following the train onset.  
20  
21  
22

23  
24 In order to examine if there was a train related change of HR at all, 'fake trains' were calculated.  
25  
26 Twenty occurrences of fake trains were introduced in the Low20 and High20 nights and 36  
27  
28 onsets in the Low36 and High36 nights. These fake trains were distributed at time intervals  
29  
30 approximately equally spaced between the actual exposure events. Analyzed HR data for these  
31  
32 consisted of 70s, where 10s served as baseline for the following 60s. As with the real trains, data  
33  
34 where polysomnographical analysis indicated that participants were awake before onset or awoke  
35  
36 during the two epochs following onset was excluded. The 60 seconds after train onset were  
37  
38 subsequently averaged over nights with low or high vibration respectively.  
39  
40  
41

42  
43 Griefahn and colleagues report a maximum increase of HR about 13.2s after event onset [26].  
44  
45 We took this time interval +/- 3s as a base for the searching area for the maximum increase  
46  
47 between 10 and 16s after train onset.  
48  
49  
50

### 51 52 53 54 **Statistical analysis**

55  
56 Data was analyzed using SPSS 20 (SPSS Inc., Ill, USA). In order to look for an overall effect of  
57  
58 trains on the HR, the integral of the HR response was taken to determine the area under the curve AuC  
59  
60 for the 60s after train onset. An Analysis of Variance (ANOVA) for repeated measurements was

1  
2  
3 calculated comparing the AuC in three factors: event (fake vs. real-train), vibration level (low vs.  
4 high) and number of trains (20 vs. 36). The effects of noise sensitivity and gender were also  
5 analyzed using ANOVA for repeated measurements with the in-between subject factor noise  
6 sensitivity/gender and the within subject factor vibration level (low vs. high). Post-hoc-  
7 comparisons are reported Bonferroni-corrected. The level of significance is set at  $\alpha=0.05$ .  
8  
9  
10  
11  
12  
13  
14  
15  
16

## 17 Results

### 20 Influence of train noise and vibration on HR

21  
22 The AuC analysis for the change of HR 60s after event onset revealed a significant main effect of  
23 train, indicating that *train events lead to an enhanced change of HR compared with the fake*  
24 *events* ( $F_{22,1}=12.0$ ,  $p=0.002$ ). There was a *significant main effect of vibration level*. A high  
25 change of HR could be observed in the high compared to the low vibration level ( $F_{22,1}=7.6$ ;  
26  $p=0.01$ ). The number of trains had no significant influence. The results are displayed in table 2.  
27  
28  
29  
30  
31  
32  
33  
34  
35  
36

37 Averaged over all trains within one night, an *increase of HR of at least 3bpm* was observed in  
38 54% of the participants in Low36, 52% in the Low20 condition, 74% in the High20 night and  
39 79% of participants in the High36 night. For the fake train events an average increase of HR of at  
40 least 3 bpm was observed in only 17 to 38% of the participants, depending on the exposure night.  
41  
42  
43  
44  
45  
46  
47  
48

49 As no significant influence of the number of trains was revealed, the four exposure conditions  
50 were combined into two conditions: a high vibration and a low vibration condition. This  
51 approach is advantageous for the signal-noise ratio, because in this way the number of analyzable  
52 trains could be increased to 56. For calculating the low vibration condition, train events from the  
53 Low20 and Low36 nights that matched the inclusion criteria described in the methods section  
54 were averaged to obtain one low vibration response. The same was done for the high vibration  
55  
56  
57  
58  
59  
60

1  
2  
3 condition. This procedure was repeated for the fake events, so that resulting responses for the  
4  
5 low and high vibration exposures for both the actual and phantom events could be compared.  
6  
7

### 8 9 **Characteristics of the HR curve**

10  
11 The HR curve shows a biphasic characteristic (see figure 2A). After approximately 9s a short  
12  
13 initial response characterized by increase of HR takes place, lasting for around 6s. This *initial*  
14  
15 *response* is significantly above the baseline between 10-13s for the low vibration condition, and  
16  
17 between 10-15s for the high vibration condition (t-test,  $p<0.05$ ). This response is in accordance  
18  
19 with the proposed search area of the maximum increase.  
20  
21

22  
23 An additional *delayed response* can also be observed. This response is characterized by a second  
24  
25 increase of HR beginning around 17 seconds after train onset and lasting for about 20 seconds for  
26  
27 the low vibration condition and about 30 seconds for the high vibration condition. The delayed  
28  
29 response is significantly above baseline between 21-22s for the low vibration condition, and  
30  
31 between 20-48s for the high vibration condition (t-test,  $p<0.05$ ). This same response could be  
32  
33 seen for each of the five individual train types (see figure 2B)  
34  
35

36  
37 This response pattern could be observed in the individual participants, but the time delay after  
38  
39 event onset showed a great variability. The individual maximum for each participant within the  
40  
41 range of the initial response (10-15s) and the delayed response (17-50s) was calculated and is  
42  
43 reported in table 2.  
44  
45

46  
47  
48  
49 For the **initial response and for the delayed response**, ANOVA for repeated measurements  
50  
51 revealed a significant main effect of event, indicating that the *train-events lead to an enhanced*  
52  
53 *change of HR compared with the fake-events* (initial response:  $F_{23,1}=13$ ,  $p=0.001$ ; delayed  
54  
55 response:  $F_{23,1}=15.5$ ,  $p=0.001$ ).  
56  
57  
58  
59  
60

1  
2  
3 The vibration level had no significant influence on the initial increase of HR ( $F_{23,1}=2.1$ , n.s.),  
4  
5 but did on the delayed response. A higher delayed increase of HR was observed in the high  
6  
7 compared to the low vibration level ( $F_{23,1}=9.4$ ,  $p=0.006$ ).  
8  
9

### 10 11 **Effect of order**

12  
13  
14 The participant's HR responses of the four nights were compared with respect to the order of  
15  
16 experimental nights using ANOVA for repeated measurements. There was no significant  
17  
18 influence of order of experimental nights on the AuC response ( $F_{22,3}=1.7$ , n.s.), nor for the  
19  
20 initial ( $F_{22,3}=2.0$ , n.s.) or delayed response ( $F_{22,3}=0.8$ ).  
21  
22

### 23 24 **Influence of sleep stage**

25  
26 The AuC, the initial maxima and the delayed maxima were compared in the sleep stages N3, N2  
27  
28 and REM. For wake stage and for stage N1 there are too few events to allow for comparison. The  
29  
30 results are presented in table 2.  
31  
32

33  
34 ANOVA for repeated measurements using the within subject factors sleep stage (stages N3, N2  
35  
36 and REM) and vibration level (low vs. high) was calculated.  
37

38  
39 The overall **AuC** revealed no significant influence of sleep stage ( $F_{23,2}=1.1$ , n.s.). The **initial**  
40  
41 **response** revealed a significant influence of sleep stage ( $F_{23,2}=5.1$   $p=0.009$ ). Bonferroni-  
42  
43 corrected post-hoc comparison reveals that the initial increase of HR was significantly higher in  
44  
45 REM than in stage N2 sleep ( $p=0.002$ ). The same significant pattern was seen in the **delayed**  
46  
47 **response** ( $F_{23,2}=4.8$   $p=0.013$ ). Here again post-hoc comparison showed that HR increase was  
48  
49 higher in REM sleep than in stage N2 ( $p=0.017$ ).  
50  
51  
52  
53  
54  
55

### 56 57 **Influence of Noise sensitivity and gender**

58  
59 **Effect of sensitivity.** The AuC, initial maximum and delayed maximum of HR change are  
60  
61 compared between participants with low (N=14) and high (N=10) noise sensitivity. The results

1  
2  
3 are displayed in table 3. No significant main effects of noise sensitivity were found in the AuC  
4  
5 (F22,1=0.007, n.s.) nor in the HR initial (F22,1=2.8, n.s.) and delayed response (F22,1=0.004,  
6  
7 n.s.). There were no significant interactions between noise sensitivity and vibration level.  
8  
9

10  
11  
12 **Effect of gender.** The results of comparison between men (N=11) and women (N=13) are shown  
13  
14 in table 3. No significant difference of gender were found in the AuC (F22,1=2.5, n.s.) nor in the  
15  
16 HR initial (F22,1=0.5, n.s.). There was a tendency for men to exhibit a stronger increase of HR in  
17  
18 the delayed response (F22,1=4.1, p=0.055).  
19  
20  
21

## 22 23 24 **Discussion**

25  
26 Our data shows that train noise and vibration exposure leads to cardiac arousals and the vibration  
27  
28 might be of particular importance for this. In response to train noise and vibration HR  
29  
30 acceleration with two maxima was observed. One sharp and short initial HR increase is revealed  
31  
32 about 9s after train onset and a longer delayed increase is observed starting about 17s after train  
33  
34 onset. In a similar study dealing with traffic noise only, Griefahn et al [26] found an increase of  
35  
36 HR matching our initial response but no delayed increase. A similar initial increase of HR has  
37  
38 been found for pure tones during sleep [33]. We propose that the second plateau we found is due  
39  
40 to the added vibration exposure, which seems to enhance the adverse effect of traffic noise on  
41  
42 HR. Supporting this interpretation we see a significant difference between the low and the high  
43  
44 vibration level for the delayed, but not for the initial increase. The combined exposure might be a  
45  
46 more pronounced alarming signal than noise alone and the HR alterations endure even after  
47  
48 cessation of the actual exposure. In accordance with previous literature on sleep disturbance due  
49  
50 to noise exposure [26 27], the highest alterations of HR were found in REM sleep. This was  
51  
52 observed for the initial and for the delayed response.  
53  
54  
55  
56  
57  
58  
59  
60

1  
2  
3 Cardiac arousals are thought to be induced by brain stem activation [34]. This subcortical  
4 activation may present a form of primary arousal in sleep and - depending on the strength of  
5 activation and on sleep stage - lead to cortical activation and arousal. Increased HR indicates  
6 subcortical arousal and enhances the probability of a cortical arousal with implications for sleep  
7 structure [34]. However, even HR acceleration without concomitant cortical arousal has been  
8 shown to have adverse effects on sleep structure. Guilleminault et al showed that forced  
9 subcortical arousals go along with disturbed sleep and the persons are not necessarily aware of  
10 their disturbed sleep the following morning [35].  
11  
12  
13  
14  
15  
16  
17  
18  
19  
20  
21  
22

23 In the short term, arousals have positive effects by ensuring a higher level of behavioral  
24 responsiveness in the presence of external stimuli, while the sleep is protected as far as possible  
25 [36]. However, in the long term increased autonomic reaction might be harmful. As Kohler and  
26 Stradling point out in a review paper, recurrent arousals are one of the mechanisms leading to  
27 cardiovascular disease in obstructive sleep apnea [37]. In that way the autonomic arousals  
28 provoked by passing trains may - if continuing over years - contribute to the slightly enhanced  
29 myocardial infarction risk that has been found in people living in areas with high traffic exposure  
30 [9-12]. The study of Tassi et al suggests that people living in areas with high railway noise for  
31 more than ten years can partly adjust their sleep to this adverse exposure. However, even after  
32 this long time of exposure, significant alterations of HR due to nocturnal railway have been  
33 found in those persons [5]. The effects of noise exposure alone found in epidemiological studies  
34 are rather small. Our data suggest that the effect of chronic traffic exposure on cardiovascular  
35 disease might be higher if vibration is also taken into account. As described in the methods of  
36 this paper, we excluded those events from the analysis where persons woke up. This approach  
37 allows a focused estimation of HR reaction on traffic noise during sleep. However, as HR  
38 reactions are usually much higher if accompanied by awakenings [26], our results very likely  
39 underestimate the effects.  
40  
41  
42  
43  
44  
45  
46  
47  
48  
49  
50  
51  
52  
53  
54  
55  
56  
57  
58  
59  
60

1  
2  
3 Our results are less clear regarding the impact of individual differences. An epidemiological  
4 study has shown that persons who state being sensitive to noise have reported more sleeping  
5 problems due to traffic than non-sensitive persons [38]. However, we found no significant effect  
6 of self-reported noise sensitivity on HR response towards nocturnal train events. During the day  
7 it has been shown that self-declared high noise sensitive persons have higher cardiovascular  
8 responses towards different ecologically relevant sound, including traffic noise [28]. The sample  
9 size of sensitive and non-sensitive participants in our study is relatively small and therefore non-  
10 significant results in particular have to be interpreted with caution. The sample size also limits  
11 any interpretation of gender effects. In coherence with the study of Griefahn, we found no  
12 significant gender difference in the initial HR amplitude [26]. We found a tendency for enhanced  
13 delayed HR response in men with a rather strong effect size. This corresponds to results from  
14 several field studies, where enhanced traffic exposure related cardiovascular diseases were found  
15 in men[10-12].  
16  
17  
18  
19  
20  
21  
22  
23  
24  
25  
26  
27  
28  
29  
30  
31  
32  
33  
34

35 In conclusion, the combined exposure of freight train noise and vibration influenced HR during  
36 sleep, whereby HR amplitudes increase with increasing vibration level. This provoked  
37 acceleration may affect cardiovascular functioning in long term [5 26] and could be a mechanism  
38 explaining the previous findings of cardiovascular disease in persons exposed to traffic in general  
39 [8-12] and rail traffic in particular [7]. To study the specific influence of vibration in contrast to  
40 noise, further studies are carried out.  
41  
42  
43  
44  
45  
46  
47  
48  
49  
50  
51  
52  
53  
54  
55  
56  
57  
58  
59  
60



## References

1. EU. White Paper - European transport policy for 2010: time to decide. . Brussels: Commission of the European Communities, 2001.
2. Aasvang GM, Overland B, Ursin R, et al. A field study of effects of road traffic and railway noise on polysomnographic sleep parameters. *Journal of the Acoustical Society of America* 2011;129(6):3716-26 doi: Doi 10.1121/1.3583547[published Online First: Epub Date]].
3. Miedema HM, Vos H. Associations between self-reported sleep disturbance and environmental noise based on reanalyses of pooled data from 24 studies. *Behav Sleep Med* 2007;5(1):1-20 doi: 10.1207/s15402010bsm0501\_1[published Online First: Epub Date]].
4. Saremi M, Greneche J, Bonnefond A, et al. Effects of nocturnal railway noise on sleep fragmentation in young and middle-aged subjects as a function of type of train and sound level. *Int J Psychophysiol* 2008;70(3):184-91 doi: S0167-8760(08)00772-1 [pii] 10.1016/j.ijpsycho.2008.08.002[published Online First: Epub Date]].
5. Tassi P, Rohmer O, Schimchowitsch S, et al. Living alongside railway tracks: Long-term effects of nocturnal noise on sleep and cardiovascular reactivity as a function of age. *Environ Int* 2010;36(7):683-9 doi: S0160-4120(10)00087-5 [pii] 10.1016/j.envint.2010.05.001[published Online First: Epub Date]].
6. Öhrström E, Gidlöf-Gunnarsson A. Effects of railway noise and vibration in combination: field and laboratory studies. EURONOISE 2009. Edinburgh, Scotland, 2009.
7. Eriksson C, Nilsson ME, Willers SM, et al. Traffic noise and cardiovascular health in Sweden: The roadside study. *Noise & Health* 2012;14(59):140-47 doi: Doi 10.4103/1463-1741.99864[published Online First: Epub Date]].
8. Babisch W. Transportation noise and cardiovascular risk: updated review and synthesis of epidemiological studies indicate that the evidence has increased. *Noise Health* 2006;8(30):1-29
9. Selander J, Nilsson ME, Bluhm G, et al. Long-term exposure to road traffic noise and myocardial infarction. *Epidemiology* 2009;20(2):272-9 doi: 10.1097/EDE.0b013e31819463bd[published Online First: Epub Date]].
10. Babisch WF, Beule B, Schust M, et al. Traffic noise and risk of myocardial infarction. *Epidemiology* 2005;16(1):33-40 doi: DOI 10.1097/01.ede.0000147104.84424.24[published Online First: Epub Date]].

- 1  
2  
3 11. Grazuleviciene R, Lekaviciute J, Mozgeris G, et al. Traffic noise emissions and myocardial infarction  
4 risk. *Pol J Environ Stud* 2004;13(6):737-41  
5  
6
- 7 12. Sorensen M, Andersen ZJ, Nordsborg RB, et al. Road traffic noise and incident myocardial  
8 infarction: a prospective cohort study. *PLoS One* 2012;7(6):e39283 doi:  
9 10.1371/journal.pone.0039283[published Online First: Epub Date] |.  
10  
11
- 12 13. Meier-Ewert HK, Ridker PM, Rifai N, et al. Effect of sleep loss on C-reactive protein, an  
13 inflammatory marker of cardiovascular risk. *J Am Coll Cardiol* 2004;43(4):678-83 doi:  
14 10.1016/j.jacc.2003.07.050[published Online First: Epub Date] |.  
15  
16
- 17 14. Babisch W. The Noise/Stress Concept, Risk Assessment and Research Needs. *Noise & health*  
18 2002;4(16):1-11  
19  
20
- 21 15. Portela PC, Fumado JC, Garcia HQ, et al. Sleep-disordered breathing and acute stroke. *Cerebrovasc*  
22 *Dis* 2009;27 Suppl 1:104-10 doi: 10.1159/000200447[published Online First: Epub Date] |.  
23  
24
- 25 16. Carter NL, Ingham P, Tran K, et al. A Field-Study of the Effects of Traffic Noise on Heart-Rate and  
26 Cardiac-Arrhythmia during Sleep. *Journal of Sound and Vibration* 1994;169(2):211-27  
27  
28
- 29 17. Basner M, Samel A. Effects of Nocturnal Aircraft Noise on Sleep Structure. *Somnologie* 2005;9:84-95  
30  
31
- 32 18. Passchier-Vermeer W. Night-time noise events and awakening. Delft The Netherlands: TNO Inro  
33 report, 2003.  
34  
35
- 36 19. Franssen E, van Dongen J, Ruysbroek J, et al. Hinder door milieufactoren en de beoordeling van de  
37 leefomgeving in Nederland Inventarisatie verstoringen 2003: TNO, 2004.  
38  
39
- 40 20. Findeis H, Peters E. Disturbing effects of low frequency sound immissions and vibrations in  
41 residential buildings. *Noise Health* 2004;6(23):29-35  
42  
43
- 44 21. Gidlof-Gunnarsson A, Ogren M, Jerson T, et al. Railway noise annoyance and the importance of  
45 number of trains, ground vibration, and building situational factors. *Noise & Health*  
46 2012;14(59):190-201 doi: Doi 10.4103/1463-1741.99895[published Online First: Epub Date] |.  
47  
48
- 49 22. Howarth HVC, Griffin MJ. The Annoyance Caused by Simultaneous Noise and Vibration from  
50 Railways. *Journal of the Acoustical Society of America* 1991;89(5):2317-23  
51  
52
- 53 23. Kiuchi M, Nagata N, Ikeno S, et al. The relationship between the response to external light  
54 stimulation and behavioral states in the human fetus: how it differs from vibroacoustic  
55 stimulation. *Early Hum Dev* 2000;58(2):153-65  
56  
57  
58  
59  
60

- 1  
2  
3  
4  
5  
6  
7  
8  
9  
10  
11  
12  
13  
14  
15  
16  
17  
18  
19  
20  
21  
22  
23  
24  
25  
26  
27  
28  
29  
30  
31  
32  
33  
34  
35  
36  
37  
38  
39  
40  
41  
42  
43  
44  
45  
46  
47  
48  
49  
50  
51  
52  
53  
54  
55  
56  
57  
58  
59  
60
24. Bjor B, Burstrom L, Nilsson T, et al. Vibration exposure and myocardial infarction incidence: the VHEEP case-control study. *Occup Med (Lond)* 2006;56(5):338-44 doi: 10.1093/occmed/kql024[published Online First: Epub Date] | .
25. Bjor B, Burstrom L, Eriksson K, et al. Mortality from myocardial infarction in relation to exposure to vibration and dust among a cohort of iron-ore miners in Sweden. *Occup Environ Med* 2010;67(3):154-8 doi: 10.1136/oem.2009.046599[published Online First: Epub Date] | .
26. Griefahn B, Bröde P, Marks A, et al. Autonomic arousals related to traffic noise during sleep. *Sleep* 2008;31(4):569-77
27. Tassi P, Saremi M, Schimchowitsch S, et al. Cardiovascular responses to railway noise during sleep in young and middle-aged adults. *Eur J Appl Physiol* 2010;108(4):671-80 doi: 10.1007/s00421-009-1270-8[published Online First: Epub Date] | .
28. Di Nisi J, Muzet A, Ehrhart J, et al. Comparison of cardiovascular responses to noise during waking and sleeping in humans. *Sleep* 1990;13(2):108-20
29. Smith M, Croy I, Ögren I, et al. On the Influence of Freight Trains on Humans: A Laboratory Investigation of the Impact of Nocturnal Low Frequency Vibration and Noise on Sleep and Heart Rate. submitted
30. Iber C, Ancoli-Israel S, Chesson A, et al. *The AASM Manual for the Scoring of Sleep and Associated Events; Rules, Terminology and Technical Specifications*. 1 ed. Westchester, IL: American Academy of Sleep Medicine, 2007.
31. Basner M, Muller U, Elmenhorst EM. Single and combined effects of air, road, and rail traffic noise on sleep and recuperation. *Sleep* 2011;34(1):11-23
32. Basner M, Mueller U, Elmenhorst EM, et al. A systematic comparison of aircraft noise induced EEG awakenings and automatically detected cardiac arousals. *internoise 2009*. Ottawa, Canada, 2009.
33. Keefe FB, Johnson LC, Hunter EJ. EEG and autonomic response pattern during waking and sleep stages. *Psychophysiology* 1971;8(2):198-212
34. Sforza E, Jouny C, Ibanez V. Cardiac activation during arousal in humans: further evidence for hierarchy in the arousal response. *Clinical neurophysiology : official journal of the International Federation of Clinical Neurophysiology* 2000;111(9):1611-9
35. Guilleminault C, Abad VC, Stoohs R. Effects of CNS activation on arousal and the autonomic nervous system. *Neurology* 2004;62(7):A6-A6

- 1  
2  
3 36. Halasz P. Arousals without awakening--dynamic aspect of sleep. *Physiol Behav* 1993;54(4):795-802  
4  
5  
6  
7 37. Kohler M, Stradling JR. Mechanisms of vascular damage in obstructive sleep apnea. *Nat Rev*  
8 *Cardiol* 2010;7(12):677-85 doi: 10.1038/nrcardio.2010.145[published Online First: Epub  
9 Date]].  
10  
11  
12 38. Aasvang GM, Moum T, Engdahl B. Self-reported sleep disturbances due to railway noise: exposure-  
13 response relationships for nighttime equivalent and maximum noise levels. *J Acoust Soc Am*  
14 2008;124(1):257-68 doi: 10.1121/1.2932074[published Online First: Epub Date]].  
15  
16  
17  
18  
19  
20  
21  
22  
23  
24  
25  
26  
27  
28  
29  
30  
31  
32  
33  
34  
35  
36  
37  
38  
39  
40  
41  
42  
43  
44  
45  
46  
47  
48  
49  
50  
51  
52  
53  
54  
55  
56  
57  
58  
59  
60

For peer review only

## Tables

**TABLE 1:** *Vibration and noise parameters applied to individual trains.*

| Train | Nr of passages per night |                 | Noise exposure |                  |                |                     | Vibration exposure (same for all trains) |                                              |
|-------|--------------------------|-----------------|----------------|------------------|----------------|---------------------|------------------------------------------|----------------------------------------------|
|       | 20 trains/night          | 36 trains/night | $L_{Aeq}$ (dB) | $L_{AFmax}$ (dB) | $t > 35dB$ (s) | $T_{10\%-90\%}$ (s) | Unweighted acceleration ( $m/s^2$ rms)   | $W_d$ Weighted peak acceleration ( $m/s^2$ ) |
| 1     | 4                        | 8               | 44.0           | 48.4             | 11.5           | 8.9                 |                                          |                                              |
| 2     | 5                        | 8               | 42.7           | 47.2             | 46.2           | 9.8                 | High = 0.072                             | High = 0.0204                                |
| 3     | 4                        | 8               | 44.5           | 49.8             | 23.7           | 8.4                 | Low = 0.036                              | Low = 0.0102                                 |
| 4     | 5                        | 8               | 45.6           | 49.8             | 29.2           | 7.9                 |                                          |                                              |
| 5     | 2                        | 4               | 42.4           | 47.2             | 56.9           | 9.2                 |                                          |                                              |

*The vibration acceleration is reported according to the ISO 2631-1 standard.*

For peer review only

**TABLE 2:** Analysis of event related HR response for each of the four exposure nights and combined for low and high vibration exposure.

|                                                          |          | Low vibration                             |                         | High vibration                             |                         |
|----------------------------------------------------------|----------|-------------------------------------------|-------------------------|--------------------------------------------|-------------------------|
|                                                          |          | 20 trains/night<br>N=24                   | 36 trains/night<br>N=23 | 20 trains/night<br>N=23                    | 36 trains/night<br>N=24 |
|                                                          |          | Mean (SD)                                 | Mean (SD)               | Mean (SD)                                  | Mean (SD)               |
| AuC                                                      | train    | 41.7 (114.5)                              | 77.2 (103.0)            | 19.4 (77.6)                                | 52.3 (86.8)             |
|                                                          | fake     | -4.6 (83.7)                               | 0.2 (54.4)              | -7.4 (51.5)                                | 2.2 (60.9)              |
| number of participants (percentage of sample population) |          |                                           |                         |                                            |                         |
| Event-related HR change of at least 3bpm                 | train    | 15 (62.5%)                                | 17 (73.9%)              | 13 (54.2%)                                 | 19 (79.2%)              |
|                                                          | fake     | 9 (37.5%)                                 | 8 (34.8%)               | 4 (16.7%)                                  | 4 (16.7%)               |
| AuC                                                      | train    | low vibration<br>Mean (SD)<br>21.2 (81.8) |                         | high vibration<br>Mean (SD)<br>62.3 (81.4) |                         |
|                                                          | fake     |                                           |                         |                                            |                         |
| Initial response                                         | train    | 1.6(1.8)                                  |                         | 2.3 (2.0)                                  |                         |
|                                                          | fake     | 0.7 (0.9)                                 |                         | 0.7 (1.0)                                  |                         |
| Delayed response                                         | train    | 2.6 (2.4)                                 |                         | 3.7 (2.8)                                  |                         |
|                                                          | fake     | 1.1 (1.0)                                 |                         | 1.3(0.9)                                   |                         |
| Sleep stage related (train events only)                  |          |                                           |                         |                                            |                         |
| AuC                                                      | stage N3 | 25.1 (166.9)                              |                         | 79.7 (114.8)                               |                         |
|                                                          | stage N2 | 30.2 (95.8)                               |                         | 53.2 (90.3)                                |                         |
|                                                          | REM      | 42.6 (162.4)                              |                         | 113.0 (203.1)                              |                         |
| Initial response                                         | stage N3 | 2.3 (2.7)                                 |                         | 3.7 (4.0)                                  |                         |
|                                                          | stage N2 | 2.1 (2.2)                                 |                         | 2.2 (1.9)                                  |                         |
|                                                          | REM      | 2.8 (2.8)                                 |                         | 4.7 (3.3)                                  |                         |
| Delayed response                                         | stage N3 | 4.5 (4.9)                                 |                         | 5.9 (4.1)                                  |                         |
|                                                          | stage N2 | 3.6 (3.6)                                 |                         | 4.5 (3.4)                                  |                         |
|                                                          | REM      | 5.6 (4.1)                                 |                         | 7.5 (5.8)                                  |                         |

Area under the curve (AuC), initial and delayed maximal increase of heart rate (HR) and number of participants with an event related change of HR of at least 3bpm are presented for each of the four experimental nights. AuC, initial and delayed maximal increase of HR are presented for the combined low and high vibration condition. Cave: the initial and delayed response is calculated as maximal increase within the first 10 to 15 or 20 to 48 seconds after train onset. This difference in search area explains partly the differences between the initial and delayed increase of HR.

**TABLE 3:** Train related HR characteristics in relation to gender and noise sensitivity of the participants.

|                   |                    |                  | low vibration | high vibration |
|-------------------|--------------------|------------------|---------------|----------------|
|                   |                    |                  | Mean (SD)     | Mean (SD)      |
| gender            | Men N=11           | AuC              | 48.1 (73.0)   | 81.2 (96.8)    |
|                   |                    | initial response | 1.7 (1.4)     | 2.0 (1.9)      |
|                   |                    | delayed response | 3.5 (2.8)     | 4.8 (3.7)      |
|                   | Women N=13         | AuC              | -1.6 (84.6)   | 46.2 (65.4)    |
|                   |                    | initial response | 1.5 (2.1)     | 2.6 (2.2)      |
|                   |                    | delayed response | 1.8 (1.7)     | 2.8 (1.5)      |
| noise sensitivity | non sensitive N=14 | AuC              | 24.0 (62.0)   | 63.8 (93.3)    |
|                   |                    | initial response | 1.1 (1.3)     | 2.0 (2.0)      |
|                   |                    | delayed response | 2.3 (2.0)     | 4.0 (3.4)      |
|                   | Sensitive N=10     | AuC              | 17.2 (107.3)  | 60.1 (65.9)    |
|                   |                    | initial response | 2.4 (2.2)     | 2.8 (2.1)      |
|                   |                    | delayed response | 3.0 (2.9)     | 3.4 (2.0)      |

## Figure Legends

*FIGURE 1. Visualization of the analytical procedure. For each of the four experimental nights, HR data is taken out for each of the train-events (black lines of the events per night) for each participant. Data is checked for artifacts and wake stage and then sampled into one average HR response for each participant with corresponding initial maximum, delayed maximum and area under the curve parameters. The grand average is built over all of the participants. The very same procedure is applied to the fake events (grey lines of the events per night).*

*FIGURE 2. A) Averaged HR response following the train events and fake events, respectively, in the low and high vibration exposure. In figure 1A, a clear HR increase after train events can be seen, while HR stays at baseline for fake events. The HR response can be divided into two components. An initial response occurring around 10 to 15 seconds after train onset and a delayed response occurring about 17 to 48 sec after train onset. The delayed response is significantly enhanced in the high vs. low vibration exposure. In figure 1B the averaged HR reaction in the high vibration condition is visualized for each of the five different train types. Although the different number of trains does not allow direct comparison, it can be seen, that in principal the same characteristics of the HR reaction is apparent for each train.*

### Funding

EU FP 7 paid the research, but did not influence the design, analysis or interpretation

### Contributorship

Ilona Croy contributed to conception and design, analysis, interpretation and wrote the article

Michael Smith contributed to conception and design, interpretation and approved the article

Kerstin Persson Waye contributed to conception and design, interpretation and approved the article

### Data Sharing

Extra data is available by emailing Ilona Croy.

### Competing Interests

None



1  
2  
3  
4  
5  
6  
7  
8  
9  
10  
11  
12  
13  
14  
15  
16  
17  
18  
19  
20  
21  
22  
23  
24  
25  
26  
27  
28  
29  
30  
31  
32  
33  
34  
35  
36  
37  
38  
39  
40  
41  
42  
43  
44  
45  
46  
47  
48  
49  
50  
51  
52  
53  
54  
55  
56  
57  
58  
59  
60

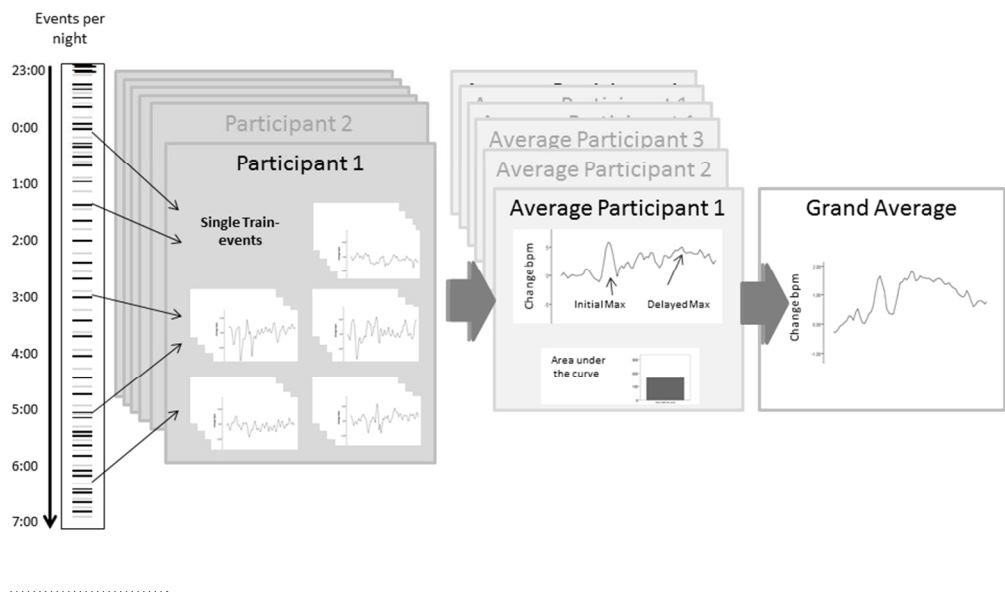

FIGURE 1. Visualization of the analytical procedure. For each of the four experimental nights, HR data is taken out for each of the train-events (black lines of the events per night) for each participant. Data is checked for artifacts and wake stage and then sampled into one average HR response for each participant with corresponding initial maximum, delayed maximum and area under the curve parameters. The grand average is built over all of the participants. The very same procedure is applied to the fake events (grey lines of the events per night).  
254x190mm (96 x 96 DPI)

only

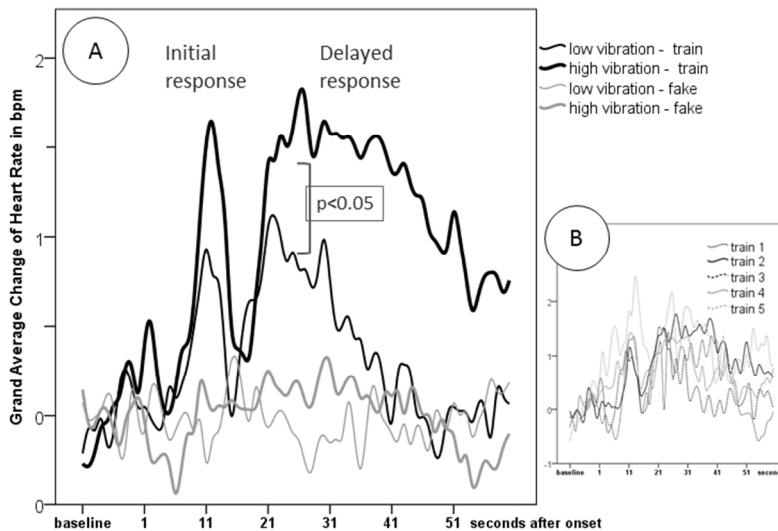

FIGURE 2. A) Averaged HR response following the train events and fake events, respectively, in the low and high vibration exposure. In figure 1A, a clear HR increase after train events can be seen, while HR stays at baseline for fake events. The HR response can be divided into two components. An initial response occurring around 10 to 15 seconds after train onset and a delayed response occurring about 17 to 48 sec after train onset. The delayed response is significantly enhanced in the high vs. low vibration exposure. In figure 1B the averaged HR reaction in the high vibration condition is visualized for each of the five different train types. Although the different number of trains does not allow direct comparison, it can be seen, that in principal the same characteristics of the HR reaction is apparent for each train.

209x296mm (96 x 96 DPI)

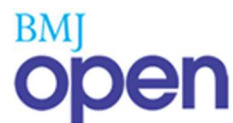

**Adverse effects of train noise and vibration on human heart rate during sleep –an experimental study**

|                                 |                                                                                                                                                                                                                                                                 |
|---------------------------------|-----------------------------------------------------------------------------------------------------------------------------------------------------------------------------------------------------------------------------------------------------------------|
| Journal:                        | <i>BMJ Open</i>                                                                                                                                                                                                                                                 |
| Manuscript ID:                  | bmjopen-2013-002655.R1                                                                                                                                                                                                                                          |
| Article Type:                   | Research                                                                                                                                                                                                                                                        |
| Date Submitted by the Author:   | 25-Mar-2013                                                                                                                                                                                                                                                     |
| Complete List of Authors:       | Croy, Ilona; University of Gothenburg, Occupational and Environmental Medicine<br>Smith, Michael; University of Gothenburg, Occupational and Environmental Medicine<br>Persson Waye, Kerstin; University of Gothenburg, Occupational and Environmental Medicine |
| <b>Primary Subject Heading</b>: | Public health                                                                                                                                                                                                                                                   |
| Secondary Subject Heading:      | Cardiovascular medicine                                                                                                                                                                                                                                         |
| Keywords:                       | Myocardial infarction < CARDIOLOGY, Hypertension < CARDIOLOGY, Audiology < OTOLARYNGOLOGY, PUBLIC HEALTH                                                                                                                                                        |
|                                 |                                                                                                                                                                                                                                                                 |

SCHOLARONE™  
Manuscripts

# Adverse effects of train noise and vibration on human heart rate during sleep –an experimental study

**Authors:** Dr. Ilona Croy<sup>1</sup>; Michael Smith<sup>1</sup>,MSc; Prof. Kerstin Persson Wayne<sup>1</sup>

<sup>1</sup>University of Gothenburg, Department of Occupational and Environmental Medicine, University of Gothenburg, Medicinaregatan 16, 405 30 Göteborg, Sweden

**Corresponding author:**

Dr. Ilona Croy  
Occupational and Environmental Medicine  
Medicinaregatan 16  
University of Gothenburg  
Box 414, 405 30 Göteborg, Sweden  
+46 (0)31 786 6814  
Ilona.croy@amm.gu.se

**Words:** 3914

**Figures:** 2

**Tables:** 3

**Short title:** Freight train effects on nocturnal heart rate

**Keywords:** train, autonomic arousals, heart rate, noise, sleep, vibration

**Acknowledgements:**

The authors wish to thank the volunteers for participation in the study. We are grateful to Agneta Agge, Mikael Ögren, Sofie Fredriksson and Josefine Larsson for their valuable assistance in conducting the trial. The study was supported by the EU FP7 funded Cargovibes Project.

**Data sharing statement:** Extra data is available by emailing Ilona Croy.

**Financial interests:** None of the authors declare a conflict of interest.

## Abstract

Objectives: Transportation of goods on railways is increasing and the majority of the increased numbers of freight trains run during the night. Transportation noise has adverse effects on sleep structure, affects heart rate during sleep and may be linked to cardiovascular disease. Freight trains also generate vibration and little is known regarding the impact of vibration on human sleep. A laboratory study was conducted to examine how a realistic nocturnal railway traffic scenario influences the heart rate (HR) during sleep.

Methods: Twenty four volunteers slept in the laboratory for six consecutive nights: one habituation night, one control and four experimental nights in which train noise and vibration was reproduced. In the experimental nights, 20 or 36 trains with low or high vibration characteristics were presented. Polysomnographical data and ECG were recorded.

Results: The train exposure lead to a significant change of HR within one minute of exposure onset ( $p=0.002$ ), characterized by an initial and a delayed increase of HR. The high vibration condition provoked an average increase of at least 3bpm per train in 79% of the participants. Cardiac responses were in general higher in the high vibration compared to the low vibration condition ( $p=0.006$ ). No significant effect of noise sensitivity and gender was revealed, although there was a tendency for men to exhibit stronger HR acceleration than women.

Conclusions: Freight trains provoke HR accelerations during sleep, and the vibration characteristics of the trains are of special importance. In long term, this may affect cardiovascular functioning of persons living close to railways.

### Article summary

#### Article Focus:

Noise of passing trains affects sleep and induces heart rate accelerations in humans. This may be linked to cardiovascular disease. Trains do not only emit noise, but also vibration and the influence of vibration is poorly understood.

#### Key message:

Our study shows, that freight train noise and vibration provokes heart rate accelerations in sleep. The HR response is characterized by two peaks, whereby the second one is even more pronounced and may dependent on the vibration amplitude.

#### Strengths and limitations:

The influence of nocturnal vibration on HR response has been studied for the first time under very well controlled laboratory conditions. However further studies with increased sample size should be carried out to analyze the influence of gender, age and sensitivity in more detail.

## Introduction

As the European market share of freight traffic is expected to increase from 8% in 2001 to 15% in 2020 [1], it is important to estimate the impact this may have on the health of persons living close by to railway lines. Railway noise is related to disturbed sleep [2-6] which in turn increases the risk of cardiovascular disease [7], supported by indications of increased cardiovascular disease in persons living close to railways [8]. Understanding how railway noise and vibration influence the cardiovascular system in sleep is therefore necessary.

The sympathetic tone is reduced in sleep which is reflected by a reduction of heart rate (HR) [9]. External noise events have the potential to disturb sleep and lead to event related increase of heart rate. This has been shown for pure tones [10] and more recently for traffic noise [11 12]. Noise induced HR changes do not seem to habituate during sleep [13], therefore they might “bear a pathogenic potential for the genesis of cardiovascular disease” [11]. Evidence that long term traffic exposure can increase the risk for cardiovascular disease comes from field studies.

1  
2  
3 Babisch summarizes that traffic exposure enhances the risk for hypertension by a factor of  
4  
5 between 1.5 to 3 [14]. An increased risk for myocardial infarction in persons living close to  
6  
7 railways has been found in several studies [15-18], although the effect sizes are rather small and  
8  
9 the effects seem to be more pronounced in men [15 16 18].  
10  
11

12 Traffic noise influences sleeping structure [19] and leads to increased awakenings [19 20]  
13  
14 throughout the night. People living close to busy roads and railways or in close proximity to  
15  
16 airports therefore often report poor sleep quality [3 4 6]. A Dutch study revealed that the number  
17  
18 of persons reporting strong difficulties falling asleep due to traffic noise increased from 18% to  
19  
20 23% between 1998 and 2003 [21]. Disturbed sleep might be one factor leading to enhanced  
21  
22 cardiovascular risk in persons exposed to traffic. It has been suggested that sleep disturbances  
23  
24 contribute to cardiovascular disease through the pathway of enhanced inflammatory processes  
25  
26 [22] or, related to this, through the pathway of enhanced stress reaction affecting the  
27  
28 cardiovascular system [23]. In a field study, Carter et al examined the influence of nocturnal  
29  
30 traffic exposure on 7 older men with cardiac arrhythmia, who lived close to a busy road [24].  
31  
32 They found an increased likelihood of single ventricular premature contractions (a form of  
33  
34 cardiac arrhythmia) after noise peaks.  
35  
36  
37  
38  
39

40  
41 Two environmental exposures commonly arising from traffic are noise and vibration. As  
42  
43 described, traffic noise disturbs sleep and leads to event related HR changes, but the effect of  
44  
45 traffic vibration is not well understood. Studies investigating annoyance show that 1) traffic  
46  
47 vibration causes annoyance, 2) annoyance increases with increasing vibration level and 3)  
48  
49 vibration enhances the annoying effect of noise [25-27]. Furthermore, higher vibration amplitude  
50  
51 is related to higher reported sleep disturbances in persons exposed to railway traffic [6]. A study  
52  
53 on human fetuses suggests that short experimental external vibration exposure alters sleep stage  
54  
55 [28]. Indications that vibration exposure is disadvantageous for cardiovascular function have  
56  
57  
58  
59  
60 been found in people exposed to high levels of vibration at work [29 30].

1  
2  
3 The effect of combined traffic vibration and noise on the cardiovascular system in sleep has - to  
4  
5 our best knowledge - not been examined. It is the aim of the present study to detect if nocturnal  
6  
7 noise and vibration exposure from freight trains provoke HR accelerations.  
8  
9

## 10 11 12 **Methods**

### 13 14 15 **Participants and procedure**

16  
17 Twenty four volunteers (11 men, 13 women, 19-28 years, mean age 22.9+/- 2.8years) slept in our  
18  
19 sleep laboratory. Twenty three were students and one was in full-time employment, recruited by  
20  
21 public advertisements placed around the campus of the University of Gothenburg. Eligible  
22  
23 persons were required to be aged between 18 and 30 years, in healthy condition, maintain normal  
24  
25 sleeping patterns and not use tobacco products. To decrease the probability of subclinical  
26  
27 breathing difficulties or apnea, participants were required to have a BMI within the normal range  
28  
29 of 18.5 - 24.99 [31]. Following initial screening, hearing was tested before volunteers were  
30  
31 accepted. Manual audiometric testing was conducted using an Entomed SA201<sup>II</sup> according to  
32  
33 ISO 8253-1. Left and right ears were tested separately at frequencies of 250, 500, 1000, 2000,  
34  
35 3000, 4000, 6000 and 8000 Hz with hearing considered to be normal if measured thresholds were  
36  
37 not more than a screening level of 20 dB HL.  
38  
39  
40  
41  
42  
43  
44

45  
46 The participants were instructed to begin attempting to fall asleep at 23:00 each night, were  
47  
48 awoken by an alarm call at 07:00 each morning, and were prohibited from sleeping outside of  
49  
50 this period. Before attending they were asked about their noise sensitivity on a 5-point Likert  
51  
52 scale. Fourteen participants (8 men, 6 women) rated themselves as being noise insensitive (points  
53  
54 1-2) and 10 rated themselves being noise sensitive (points 3-5). For each participant, the study  
55  
56 consisted of one habituation night and one control night proceeding four experimental nights in  
57  
58 which simulated trains passed. The arrangement of the experimental nights was randomized  
59  
60



1  
2  
3 across participants. Gender and noise sensitivity were approximately equally spread around the  
4 randomization table. In two of the four experimental nights, the participants were exposed to 20  
5 trains per night with all trains having high vibration one night and low vibration in the other  
6 (High20 and Low20 respectively). In the remaining two nights they were exposed to 36 trains per  
7 night again with either high or low vibrations (High36 and Low36). The acoustic signal for the  
8 trains was not varied with vibration amplitude. There were more train passages between the  
9 periods of 23:00-01:00 and 05:00-07:00 to reflect typical real world scenarios.  
10  
11  
12  
13  
14  
15  
16  
17  
18

19  
20 The sleep laboratory consists of three individual rooms isolated from external noise and  
21 vibration, furnished to simulate a typical bedroom with a bed, chairs, desk and small chest of  
22 drawers. Eighty eight ceiling loudspeakers reproduced the low frequency content of noise below  
23 125 Hz, and higher frequencies were generated by two loudspeaker cabinets in the room corners.  
24  
25 Because of the unrealistically low background noise levels in the rooms (<14 dBA), for the  
26 duration of the trial artificial ventilation noise was introduced at a level of 25 dBA measured at  
27 the pillow position on the bed. In addition to the bedrooms the participants had private access to  
28 a shared a communal space outfitted with a kitchen, dining area and living area with sofa and  
29 television. They were free to come and go as they desired during the daytime, being required to  
30 arrive by 20:00 each evening to ensure rest prior to bedtime and to allow sufficient time for  
31 electrode attachment.  
32  
33  
34  
35  
36  
37  
38  
39  
40  
41  
42  
43  
44  
45  
46

47 Vibration and noise exposure were similar to another study conducted in our laboratory [32] and  
48 are only summarized here. Five different train passages were synthesized based upon analysis of  
49 accelerometer and sound level measurements performed in the field. Noise signals were low pass  
50 filtered to correspond to a fully closed window. The vibration exposure was an amplitude  
51 modulated 10 Hz signal applied along the lengthwise horizontal axis of the bed by  
52 electrodynamic shakers with a frequency response of 5-40 Hz mounted to the underside of the  
53 bed frame. The vibration began when the train noise signal exceeded an A-weighted equivalent  
54  
55  
56  
57  
58  
59  
60

1  
2  
3 level ( $L_{Aeq}$ ) of 35 dB, ensuring masking of any audible mechanical operation noise. Further  
4  
5 acoustic and vibration data for each individual train is presented in Table 1.  
6  
7

## 8 9 **Ethics Statement**

10  
11 The study followed the Declaration of Helsinki on Biomedical Research Involving Human  
12  
13 Subjects and was approved by the Ethics Committee from the University of Göteborg (920-11).  
14  
15 All participants provided written informed consent.  
16  
17

## 18 19 **Cardiac response and polysomnography**

20  
21 During all experimental nights, physiological data was recorded using ambulatory  
22  
23 polysomnogram devices (SOMNOscreen plus PSG+, SOMNOmedics GmbH, Germany). The  
24  
25 time resolution of the onset was 4.7+/- 3.4 seconds.  
26  
27

28  
29 Cardiac activity was recorded via a modified lead II torso placement electrocardiogram (ECG) at  
30  
31 a sampling frequency of 256 Hz as per the American Academy of Sleep Medicine [33]. To  
32  
33 identify sleep stage, electroencephalogram (EEG), electrooculogram (EOG) and submental  
34  
35 electromyogram (EMG) were also recorded using standardized surface electrode placements and  
36  
37 sampling and filter frequencies. To ensure good signal quality, following electrode attachment it  
38  
39 was checked that the electrical impedance of each contact was  $\leq 5k\Omega$ . Thirty second epoch sleep  
40  
41 staging was performed manually by a trained sleep technician. Additionally, participants wore  
42  
43 two effort belts to record breathing rates and a finger pulse oximeter to record blood oxygen  
44  
45 saturation, plethysmogram and pulse information, although this data will not be reported here.  
46  
47 Due to a technical fault, ECG was not obtained for one participant (female, noise sensitive) in the  
48  
49 High20 night and so could not be included in analysis.  
50  
51  
52  
53  
54

## 55 56 57 **Event related analysis and control condition**

58  
59 In order to examine event related changes of HR, data from the four exposure nights was  
60  
analyzed. The continuously recorded ECG (sampling frequency of 256Hz) was converted into

1  
2  
3 HR (in bpm) in 1s intervals through the whole night. EEG and ECG recordings were  
4  
5 synchronized with the train exposure events, thus allowing a direct temporal association between  
6  
7 the occurrence of a train and the participant's HR reaction and sleep stages. Analysis revealed  
8  
9 that 9.9% of the train onsets occurred during wake stage, 8.1% during stage N1, 42% during  
10  
11 stage N2, 21.4% during stage N3 and 17.8% during REM.  
12  
13

14  
15 The procedure of HR analysis is visualized in Figure 1. HRs below 35 and above 130bpm were  
16  
17 excluded from the analysis [11 34]. This was the case for 4.1% of the events. For analysis of  
18  
19 event related HR change (bpm), only train events where participants were asleep were  
20  
21 considered. This approach was chosen because Griefahn and colleagues showed that HR  
22  
23 response to traffic noise differs depending on whether the participants do or do not awake [11].  
24  
25 The relatively few trains per night in our study do not allow additional examination of HR  
26  
27 response in the case of awakenings. An event related awakening has been defined as a sleep  
28  
29 stage change to Wake from any other stage in at least one of the two epochs (30s) following the  
30  
31 train onset [35]. The first of these was determined by that having at least 15s under influence of  
32  
33 the event. Additionally, events for which the participants were awake in the epoch preceding  
34  
35 train onset were excluded from the analysis. The whole procedure left 72.4% of the train events  
36  
37 in the low vibration condition and 66.1% of the train events in the high vibration condition for  
38  
39 analysis. In accordance with the literature, the screening interval for cardiac activations was set  
40  
41 to 60s after train onset [11 34]. In order to analyze change of HR, the average cardiac response  
42  
43 from the 10s preceding the train event was used as a baseline value for each given event and  
44  
45 subsequently subtracted from the cardiac response in each of the sixty 1s time intervals following  
46  
47 the train onset.  
48  
49  
50  
51  
52  
53

54  
55 In order to examine if there was a train related change of HR at all, '*fake trains*' were calculated.  
56  
57 Fake trains were defined as time intervals of 60s not accompanied by a real train event,  
58  
59 distributed at time intervals approximately equally spaced between the actual exposure events.  
60

1  
2  
3 Twenty of these were introduced in the Low20 and High20 nights and 36 in the Low36 and  
4 High36 nights. . Analyzed HR data for these consisted of 70s, where 10s served as baseline for  
5  
6 the following 60s. As with the real exposures, data where polysomnographical analysis indicated  
7  
8 that participants were awake before onset or awoke during the two epochs following onset was  
9  
10 excluded. All event-related 60s periods were subsequently averaged over nights with low or high  
11  
12 vibration respectively. The whole procedure was the same for each of the four nights to avoid any  
13  
14 potential investigator bias.  
15  
16  
17  
18

19 Griefahn and colleagues report a maximum increase of HR about 13.2s after event onset [11].

20 We took this time interval +/- 3s as a base for the searching area for the maximum increase  
21  
22 between 10 and 16s after train onset.  
23  
24  
25  
26  
27  
28  
29

### 30 **Statistical analysis**

31  
32 Data was analyzed using SPSS 20 (SPSS Inc., Ill, USA). In order to identify any overall effect of  
33  
34 trains on the HR, the integral of the HR response was taken to determine the area under the curve (AuC)  
35  
36 for the 60s after train onset. An Analysis of Variance (ANOVA) for repeated measurements was  
37  
38 calculated comparing the AuC in three factors: event (fake vs. real-train), vibration level (low vs.  
39  
40 high) and number of trains (20 vs. 36). The effects of noise sensitivity and gender were also  
41  
42 analyzed using ANOVA for repeated measurements with the between subject factor noise  
43  
44 sensitivity/gender and the within subject factor vibration level (low vs. high). Post-hoc-  
45  
46 comparisons are reported Bonferroni-corrected. The level of significance is set at  $\alpha=0.05$ .  
47  
48  
49  
50  
51  
52  
53  
54  
55  
56  
57  
58  
59  
60

## Results

### Influence of train noise and vibration on HR

The AuC analysis for the change of HR 60s after event onset revealed a significant main effect of train, indicating that *train events lead to an enhanced change of HR compared with the fake events* ( $F_{22,1}=12.0$ ,  $p=0.002$ ). Furthermore there were significantly more awakenings in the train vs. fake events ( $F_{22,1}=40.3$ ,  $p<0.001$ ).

There was a *significant main effect of vibration level*. A higher change of HR and an increased number of awakenings could be observed in the high compared to the low vibration level (HR:  $F_{22,1}=7.6$ ;  $p=0.01$ ; Awakenings:  $F_{22,1}=6.5$ ;  $p=0.014$ ). The number of trains had no significant influence on the HR change. The results are displayed in table 2.

Averaged over all trains within one night, an *increase of HR of at least 3bpm* was observed in 54% of the participants in Low36, 52% in the Low20 condition, 74% in the High20 night and 79% of participants in the High36 night. For the fake train events an average increase of HR of at least 3 bpm was observed in only 17 to 38% of the participants, depending on the exposure night.

As no significant influence of the number of trains was revealed, the four exposure conditions were combined into two conditions: a high vibration and a low vibration condition. This approach is advantageous for the signal-noise ratio, because in this way the number of analyzable trains could be increased to 56. For calculating the low vibration condition, train events from the Low20 and Low36 nights that matched the inclusion criteria described in the methods section were averaged to obtain one low vibration response. The same method was performed for the high vibration condition. This procedure was repeated for the fake events, so that resulting responses for the low and high vibration exposures for both the actual and phantom events could be compared.

## Characteristics of the HR curve

The HR curve shows a biphasic characteristic (see figure 2A). After approximately 9s a short initial response characterized by increase of HR takes place, lasting for around 6s. This *initial response* is significantly above the baseline between 10-13s for the low vibration condition, and between 10-15s for the high vibration condition (t-test,  $p<0.05$ ). This response is in accordance with the proposed search area of the maximum increase.

An additional *delayed response* can also be observed. This response is characterized by a second increase of HR beginning around 17s following train onset and with a duration of around 20s for the low vibration condition and about 30s for the high vibration condition. The delayed response is significantly above baseline between 21-22s for the low vibration condition, and between 20-48s for the high vibration condition (t-test,  $p<0.05$ ). This same response could be seen for each of the five individual train types (see figure 2B)

This response pattern could be observed in the individual participants, but the time delay after event onset showed a great variability. The individual maximum for each participant within the range of the initial response (10-15s) and the delayed response (17-50s) was calculated and is reported in table 2.

For the **initial response and for the delayed response**, ANOVA for repeated measurements revealed a significant main effect of event, indicating that the *train-events led to an enhanced change of HR compared with the fake-events* (initial response:  $F_{23,1}=13$ ,  $p=0.001$ ; delayed response:  $F_{23,1}=15.5$ ,  $p=0.001$ ).

The vibration level had no significant influence on the initial increase of HR ( $F_{23,1}=2.1$ , n.s.), but affected the delayed response. A higher delayed increase of HR was observed in the high compared to the low vibration level ( $F_{23,1}=9.4$ ,  $p=0.006$ ).

## Effect of order

The participant's HR responses of the four nights were compared with respect to the order of experimental nights using ANOVA for repeated measurements. There was no significant influence of order of experimental nights on the AuC response ( $F_{22,3} = 1.7$ , n.s.), nor for the initial ( $F_{22,3} = 2.0$ , n.s.) or delayed response ( $F_{22,3} = 0.8$ ).

## Influence of sleep stage

The AuC, the initial maxima and the delayed maxima were compared in the sleep stages N3, N2 and REM. For wake stage and for stage N1 there were too few events to allow for comparison.

The results are presented in table 2.

ANOVA for repeated measurements using the within subject factors sleep stage (stages N3, N2 and REM) and vibration level (low vs. high) was calculated.

The overall AuC revealed no significant influence of sleep stage ( $F_{23,2} = 1.1$ , n.s.). The **initial response** revealed a significant influence of sleep stage ( $F_{23,2} = 5.1$   $p = 0.009$ ). Bonferroni-corrected post-hoc comparison reveals that the initial increase of HR was significantly higher in REM than in stage N2 sleep ( $p = 0.002$ ). The same significant pattern was seen in the **delayed response** ( $F_{23,2} = 4.8$   $p = 0.013$ ). Here again post-hoc comparison showed that HR increase was higher in REM sleep than in stage N2 ( $p = 0.017$ ).

## Influence of Noise sensitivity and gender

**Effect of sensitivity.** The AuC, initial maxima and delayed maxima of HR change are compared between participants with low ( $N = 14$ ) and high ( $N = 10$ ) noise sensitivity. The results are displayed in table 3. No significant main effects of noise sensitivity were found in the AuC ( $F_{22,1} = 0.007$ , n.s.) nor in the initial ( $F_{22,1} = 2.8$ , n.s.) or delayed response ( $F_{22,1} = 0.004$ , n.s.).

There were no significant interactions between noise sensitivity and vibration level.

1  
2  
3  
4  
5  
6 **Effect of gender.** The results of comparisons between men (N=11) and women (N=13) are  
7  
8 shown in table 3. No significant differences were found in the AuC ( $F_{22,1}=2.5$ , n.s.) or in the  
9  
10 HR initial ( $F_{22,1}=0.5$ , n.s.) between genders. There was a tendency for men to exhibit a stronger  
11  
12 increase of HR in the delayed response ( $F_{22,1}=4.1$ ,  $p=0.055$ ).  
13  
14

## 15 16 17 **Discussion**

18  
19  
20 Our data shows that train noise and vibration exposure leads to an increased number of  
21  
22 awakenings and to cardiac arousals, and that vibration might be of particular importance. Heart  
23  
24 rate acceleration with two maxima was observed following trains noise and vibration. One rapid  
25  
26 and distinct initial HR increase is evident around 9s after train onset and a lengthier delayed  
27  
28 increase is observed starting about 17s after train onset. In a similar study dealing with traffic  
29  
30 noise alone, Griefahn et al [11] found an increase of HR matching our initial response but no  
31  
32 delayed increase. A similar initial increase of HR has been found for pure tones during sleep  
33  
34 [36]. We propose that the second plateau is due to the additional vibration exposure, which  
35  
36 seems to either act in isolation to result in cardiac response, or alternatively enhance or interact  
37  
38 with any delayed effects of rail noise on HR. Supporting this interpretation we see a significant  
39  
40 difference between the low and the high vibration level for the delayed, but not for the initial  
41  
42 increase. The combined exposure might be a more pronounced alarming signal than noise alone  
43  
44 and the HR alterations endure even after cessation of the actual exposure. In accordance with  
45  
46 previous literature on sleep disturbance due to noise exposure [10-12], the highest alterations of  
47  
48 HR were found in REM sleep. This was observed for both the initial and delayed response.  
49  
50  
51  
52  
53  
54

55  
56 Cardiac arousals are likely induced by brain stem activation [37]. This subcortical activation may  
57  
58 present a form of primary arousal in sleep and - depending on the strength of activation and on  
59  
60 sleep stage - lead to cortical activation and arousal. Increased HR indicates subcortical arousal



1  
2  
3 and enhances the probability of a cortical arousal with implications for sleep structure [37].  
4  
5 However, even HR acceleration without concomitant cortical arousal has been shown to have  
6  
7 adverse effects on sleep structure. Guilleminault et al showed that forced subcortical arousals  
8  
9 accompany disturbed sleep and the persons are not necessarily aware of their disturbed sleep the  
10  
11 following morning [38].  
12  
13

14  
15  
16 In the short term, arousals have positive effects by ensuring a higher level of behavioral  
17  
18 responsiveness in the presence of external stimuli, while the sleep is protected as far as possible  
19  
20 [39]. However, in the long term increased autonomic reaction might be harmful. As Kohler and  
21  
22 Stradling point out in a review paper, recurrent arousals are one of the mechanisms leading to  
23  
24 cardiovascular disease in obstructive sleep apnea [40]. In this manner the autonomic arousals  
25  
26 provoked by passing trains may - if continuing over years - contribute to the slightly enhanced  
27  
28 myocardial infarction risk that has been found in people living in areas with high traffic exposure  
29  
30 [15-18]. The study of Tassi et al suggests that people living in areas with high railway noise for  
31  
32 more than ten years can partly adjust their sleep to this adverse exposure. However, even after  
33  
34 such long-term exposure, significant alterations of HR due to nocturnal railway have been found  
35  
36 [5]. In epidemiological studies, the effects of noise exposure alone are rather small [15-18]. Our  
37  
38 data suggests that the effect of chronic traffic exposure on cardiovascular disease might be higher  
39  
40 if vibration is additionally taken into account. As described in the methods of this paper, we  
41  
42 excluded events from the analysis where persons awoke. This approach allows a focused  
43  
44 estimation of HR reaction from traffic noise during sleep. However, as HR reactions are usually  
45  
46 greater if accompanied by awakenings [11], our results very likely underestimate the effects. We  
47  
48 found an average train-related increase of 3bpm in 79% of participants, supporting previously  
49  
50 reported data [10]. It is not possible with the present study design to estimate the clinical  
51  
52 relevance of these results. However, an increase of HR in sleep perhaps reflects a higher  
53  
54  
55  
56  
57  
58  
59  
60

1  
2  
3 sympathetic tone [9] and this may contribute to the enhanced the risk for hypertension in long  
4  
5 term traffic exposure [14].  
6  
7

8  
9 Our results are less clear regarding the impact of interindividual differences. Previous  
10  
11 epidemiological research has shown that persons who state being sensitive to noise report greater  
12  
13 sleeping problems due to traffic than non-sensitive persons [41]. However, we found no  
14  
15 significant effect of self-reported noise sensitivity on HR response towards nocturnal train  
16  
17 events. During the day it has been shown that self-declared highly noise sensitive persons have  
18  
19 higher cardiovascular responses towards different ecologically relevant sound, including traffic  
20  
21 noise [13]. The sample size of sensitive and non-sensitive participants in our study is relatively  
22  
23 small and therefore non-significant results in particular have to be interpreted with caution. The  
24  
25 sample size also limits any interpretation of gender effects. In coherence with the study of  
26  
27 Griefahn, we found no significant gender differences in the initial HR amplitude [11]. We found  
28  
29 a tendency for enhanced delayed HR response in men with a rather strong effect size. This  
30  
31 corresponds to results from several field studies, where enhanced traffic exposure related  
32  
33 cardiovascular diseases were found in men [15 16 18].  
34  
35  
36  
37  
38

39  
40 We are aware of the limitations of the study: Regarding internal validity, the time resolution of  
41  
42 the measurement could potentially lead to a smoothing of the averaged data, underestimating our  
43  
44 results. Nevertheless, a clear effect of enhanced HR reaction in high vibration conditions can be  
45  
46 seen. We argue that vibration exposure is responsible for the second plateau. However, a  
47  
48 vibration alone condition i.e. in the absence of noise, is needed to confirm this. With respect to  
49  
50 external validity, the study is limited to the homogenous group of young and healthy participants.  
51  
52 To generalize the results, a broader age range would be preferable and the study should be  
53  
54 replicated in field conditions.  
55  
56  
57  
58  
59  
60

1  
2  
3 In conclusion, the combined exposure of freight train noise and vibration influenced HR during  
4 sleep, whereby HR amplitudes increase with increasing vibration level. This provoked  
5 acceleration may affect cardiovascular functioning in long term [5 11] and could be a mechanism  
6 explaining the previous findings of cardiovascular disease in persons exposed to traffic in general  
7 [14-18] and rail traffic in particular [8]. To study the specific influence of vibration in contrast to  
8 noise, further studies are required.  
9  
10  
11  
12  
13  
14  
15  
16  
17  
18  
19  
20  
21  
22  
23  
24  
25  
26  
27  
28  
29  
30  
31  
32  
33  
34  
35  
36  
37  
38  
39  
40  
41  
42  
43  
44  
45  
46  
47  
48  
49  
50  
51  
52  
53  
54  
55  
56  
57  
58  
59  
60

For peer review only

## References

1. EU. White Paper - European transport policy for 2010: time to decide. . Brussels: Commission of the European Communities, 2001.
2. Aasvang GM, Overland B, Ursin R, et al. A field study of effects of road traffic and railway noise on polysomnographic sleep parameters. *Journal of the Acoustical Society of America* 2011;129(6):3716-26 doi: Doi 10.1121/1.3583547[published Online First: Epub Date]].
3. Miedema HM, Vos H. Associations between self-reported sleep disturbance and environmental noise based on reanalyses of pooled data from 24 studies. *Behav Sleep Med* 2007;5(1):1-20 doi: 10.1207/s15402010bsm0501\_1[published Online First: Epub Date]].
4. Saremi M, Greneche J, Bonnefond A, et al. Effects of nocturnal railway noise on sleep fragmentation in young and middle-aged subjects as a function of type of train and sound level. *Int J Psychophysiol* 2008;70(3):184-91 doi: S0167-8760(08)00772-1 [pii] 10.1016/j.ijpsycho.2008.08.002[published Online First: Epub Date]].
5. Tassi P, Rohmer O, Schimchowitsch S, et al. Living alongside railway tracks: Long-term effects of nocturnal noise on sleep and cardiovascular reactivity as a function of age. *Environ Int* 2010;36(7):683-9 doi: S0160-4120(10)00087-5 [pii] 10.1016/j.envint.2010.05.001[published Online First: Epub Date]].
6. Öhrström E, Gidlöf-Gunnarsson A. Effects of railway noise and vibration in combination: field and laboratory studies. EURONOISE 2009. Edinburgh, Scotland, 2009.
7. Laugsand LE, Strand LB, Platou C, et al. Insomnia and the risk of incident heart failure: a population study. *Eur Heart J* 2013 doi: 10.1093/eurheartj/ehs019[published Online First: Epub Date]].
8. Eriksson C, Nilsson ME, Willers SM, et al. Traffic noise and cardiovascular health in Sweden: The roadside study. *Noise & Health* 2012;14(59):140-47 doi: Doi 10.4103/1463-1741.99864[published Online First: Epub Date]].
9. Gula LJ, Krahn AD, Skanes AC, et al. Clinical relevance of arrhythmias during sleep: guidance for clinicians. *Heart* 2004;90(3):347-52
10. Hord DJ, Lubin A, Johnson LC. The evoked heart rate response during sleep. *Psychophysiology* 1966;3(1):47-54
11. Griefahn B, Bröde P, Marks A, et al. Autonomic arousals related to traffic noise during sleep. *Sleep* 2008;31(4):569-77

12. Tassi P, Saremi M, Schimchowitsch S, et al. Cardiovascular responses to railway noise during sleep in young and middle-aged adults. *Eur J Appl Physiol* 2010;108(4):671-80 doi: 10.1007/s00421-009-1270-8[published Online First: Epub Date] |.
13. Di Nisi J, Muzet A, Ehrhart J, et al. Comparison of cardiovascular responses to noise during waking and sleeping in humans. *Sleep* 1990;13(2):108-20
14. Babisch W. Transportation noise and cardiovascular risk: updated review and synthesis of epidemiological studies indicate that the evidence has increased. *Noise Health* 2006;8(30):1-29
15. Babisch WF, Beule B, Schust M, et al. Traffic noise and risk of myocardial infarction. *Epidemiology* 2005;16(1):33-40 doi: DOI 10.1097/01.ede.0000147104.84424.24[published Online First: Epub Date] |.
16. Grazuleviciene R, Lekaviciute J, Mozgeris G, et al. Traffic noise emissions and myocardial infarction risk. *Pol J Environ Stud* 2004;13(6):737-41
17. Selander J, Nilsson ME, Bluhm G, et al. Long-term exposure to road traffic noise and myocardial infarction. *Epidemiology* 2009;20(2):272-9 doi: 10.1097/EDE.0b013e31819463bd[published Online First: Epub Date] |.
18. Sorensen M, Andersen ZJ, Nordsborg RB, et al. Road traffic noise and incident myocardial infarction: a prospective cohort study. *PLoS One* 2012;7(6):e39283 doi: 10.1371/journal.pone.0039283[published Online First: Epub Date] |.
19. Basner M, Samel A. Effects of Nocturnal Aircraft Noise on Sleep Structure. *Somnologie* 2005;9:84-95
20. Passchier-Vermeer W. Night-time noise events and awakening. Delft The Netherlands: TNO Inro report, 2003.
21. Franssen E, van Dongen J, Ruysbroek J, et al. Hinder door milieufactoren en de beoordeling van de leefomgeving in Nederland Inventarisatie verstoringen 2003: TNO, 2004.
22. Meier-Ewert HK, Ridker PM, Rifai N, et al. Effect of sleep loss on C-reactive protein, an inflammatory marker of cardiovascular risk. *J Am Coll Cardiol* 2004;43(4):678-83 doi: 10.1016/j.jacc.2003.07.050[published Online First: Epub Date] |.
23. Babisch W. The Noise/Stress Concept, Risk Assessment and Research Needs. *Noise & health* 2002;4(16):1-11
24. Carter NL, Ingham P, Tran K, et al. A Field-Study of the Effects of Traffic Noise on Heart-Rate and Cardiac-Arrhythmia during Sleep. *Journal of Sound and Vibration* 1994;169(2):211-27

- 1  
2  
3  
4  
5  
6  
7  
8  
9  
10  
11  
12  
13  
14  
15  
16  
17  
18  
19  
20  
21  
22  
23  
24  
25  
26  
27  
28  
29  
30  
31  
32  
33  
34  
35  
36  
37  
38  
39  
40  
41  
42  
43  
44  
45  
46  
47  
48  
49  
50  
51  
52  
53  
54  
55  
56  
57  
58  
59  
60
25. Findeis H, Peters E. Disturbing effects of low frequency sound immissions and vibrations in residential buildings. *Noise Health* 2004;6(23):29-35
  26. Gidlof-Gunnarsson A, Ogren M, Jerson T, et al. Railway noise annoyance and the importance of number of trains, ground vibration, and building situational factors. *Noise & Health* 2012;14(59):190-201 doi: Doi 10.4103/1463-1741.99895[published Online First: Epub Date]].
  27. Howarth HVC, Griffin MJ. The Annoyance Caused by Simultaneous Noise and Vibration from Railways. *Journal of the Acoustical Society of America* 1991;89(5):2317-23
  28. Kiuchi M, Nagata N, Ikeno S, et al. The relationship between the response to external light stimulation and behavioral states in the human fetus: how it differs from vibroacoustic stimulation. *Early Hum Dev* 2000;58(2):153-65
  29. Bjor B, Burstrom L, Eriksson K, et al. Mortality from myocardial infarction in relation to exposure to vibration and dust among a cohort of iron-ore miners in Sweden. *Occup Environ Med* 2010;67(3):154-8 doi: 10.1136/oem.2009.046599[published Online First: Epub Date]].
  30. Bjor B, Burstrom L, Nilsson T, et al. Vibration exposure and myocardial infarction incidence: the VHEEP case-control study. *Occup Med (Lond)* 2006;56(5):338-44 doi: 10.1093/occmed/kql024[published Online First: Epub Date]].
  31. WHO. Obesity: Preventing and managing the global epidemic: Report of a WHO consultation. Geneva: World Health Organisation, 2000.
  32. Smith M, Croy I, Ögren I, et al. On the Influence of Freight Trains on Humans: A Laboratory Investigation of the Impact of Nocturnal Low Frequency Vibration and Noise on Sleep and Heart Rate. submitted
  33. Iber C, Ancoli-Israel S, Chesson A, et al. *The AASM Manual for the Scoring of Sleep and Associated Events; Rules, Terminology and Technical Specifications*. 1 ed. Westchester, IL: American Academy of Sleep Medicine, 2007.
  34. Basner M, Muller U, Elmenhorst EM. Single and combined effects of air, road, and rail traffic noise on sleep and recuperation. *Sleep* 2011;34(1):11-23
  35. Basner M, Mueller U, Elmenhorst EM, et al. A systematic comparison of aircraft noise induced EEG awakenings and automatically detected cardiac arousals. *internoise 2009*. Ottawa, Canada, 2009.
  36. Keefe FB, Johnson LC, Hunter EJ. EEG and autonomic response pattern during waking and sleep stages. *Psychophysiology* 1971;8(2):198-212

- 1  
2  
3  
4  
5  
6  
7  
8  
9  
10  
11  
12  
13  
14  
15  
16  
17  
18  
19  
20  
21  
22  
23  
24  
25  
26  
27  
28  
29  
30  
31  
32  
33  
34  
35  
36  
37  
38  
39  
40  
41  
42  
43  
44  
45  
46  
47  
48  
49  
50  
51  
52  
53  
54  
55  
56  
57  
58  
59  
60
37. Sforza E, Jouny C, Ibanez V. Cardiac activation during arousal in humans: further evidence for hierarchy in the arousal response. *Clinical neurophysiology : official journal of the International Federation of Clinical Neurophysiology* 2000;111(9):1611-9
38. Guilleminault C, Abad VC, Stoohs R. Effects of CNS activation on arousal and the autonomic nervous system. *Neurology* 2004;62(7):A6-A6
39. Halasz P. Arousals without awakening--dynamic aspect of sleep. *Physiol Behav* 1993;54(4):795-802
40. Kohler M, Stradling JR. Mechanisms of vascular damage in obstructive sleep apnea. *Nat Rev Cardiol* 2010;7(12):677-85 doi: 10.1038/nrcardio.2010.145[published Online First: Epub Date]].
41. Aasvang GM, Moum T, Engdahl B. Self-reported sleep disturbances due to railway noise: exposure-response relationships for nighttime equivalent and maximum noise levels. *J Acoust Soc Am* 2008;124(1):257-68 doi: 10.1121/1.2932074[published Online First: Epub Date]].

## Tables

**TABLE 1:** *Vibration and noise parameters applied to individual trains.*

| Train | Nr of passages per night |                 | Noise exposure |                  |                |                     | Vibration exposure (same for all trains) |                                              |
|-------|--------------------------|-----------------|----------------|------------------|----------------|---------------------|------------------------------------------|----------------------------------------------|
|       | 20 trains/night          | 36 trains/night | $L_{Aeq}$ (dB) | $L_{AFmax}$ (dB) | $t > 35dB$ (s) | $T_{10\%-90\%}$ (s) | Unweighted acceleration ( $m/s^2$ rms)   | $W_d$ Weighted peak acceleration ( $m/s^2$ ) |
| 1     | 4                        | 8               | 44.0           | 48.4             | 11.5           | 8.9                 |                                          |                                              |
| 2     | 5                        | 8               | 42.7           | 47.2             | 46.2           | 9.8                 | High = 0.072                             | High = 0.0204                                |
| 3     | 4                        | 8               | 44.5           | 49.8             | 23.7           | 8.4                 | Low = 0.036                              | Low = 0.0102                                 |
| 4     | 5                        | 8               | 45.6           | 49.8             | 29.2           | 7.9                 |                                          |                                              |
| 5     | 2                        | 4               | 42.4           | 47.2             | 56.9           | 9.2                 |                                          |                                              |

*The vibration acceleration is reported according to the ISO 2631-1 standard.*

For peer review only



TABLE 2: Analysis of event related HR response for each of the four exposure nights and combined for low and high vibration exposure.

|                                                          |          | Low vibration           |                         | High vibration          |                         |
|----------------------------------------------------------|----------|-------------------------|-------------------------|-------------------------|-------------------------|
|                                                          |          | 20 trains/night<br>N=24 | 36 trains/night<br>N=23 | 20 trains/night<br>N=23 | 36 trains/night<br>N=24 |
|                                                          |          | Mean (SD)               | Mean (SD)               | Mean (SD)               | Mean (SD)               |
| HR AuC                                                   | train    | 41.7 (114.5)            | 77.2 (103.0)            | 19.4 (77.6)             | 52.3 (86.8)             |
|                                                          | fake     | -4.6 (83.7)             | 0.2 (54.4)              | -7.4 (51.5)             | 2.2 (60.9)              |
| Number of event related awakenings per night             | train    | 3.3 (2.3)               | 4.2 (2.6)               | 5.2 (3.2)               | 5.6 (3.4)               |
|                                                          | fake     | 1.5 (0.7)               | 1.5 (0.6)               | 1.2 (0.4)               | 1.8 (0.8)               |
| number of participants (percentage of sample population) |          |                         |                         |                         |                         |
| Event-related HR change of at least 3bpm                 | train    | 15 (62.5%)              | 17 (73.9%)              | 13 (54.2%)              | 19 (79.2%)              |
|                                                          | fake     | 9 (37.5%)               | 8 (34.8%)               | 4 (16.7%)               | 4 (16.7%)               |
|                                                          |          | low vibration           |                         | high vibration          |                         |
| AuC                                                      | train    | Mean (SD)               |                         | Mean (SD)               |                         |
|                                                          |          | 21.2 (81.8)             |                         | 62.3 (81.4)             |                         |
| Initial response                                         | train    | 1.6(1.8)                |                         | 2.3 (2.0)               |                         |
|                                                          | fake     | 0.7 (0.9)               |                         | 0.7 (1.0)               |                         |
| Delayed response                                         | train    | 2.6 (2.4)               |                         | 3.7 (2.8)               |                         |
|                                                          | fake     | 1.1 (1.0)               |                         | 1.3(0.9)                |                         |
| Sleep stage related (train events only)                  |          |                         |                         |                         |                         |
| AuC                                                      | stage N3 | 25.1 (166.9)            |                         | 79.7 (114.8)            |                         |
|                                                          | stage N2 | 30.2 (95.8)             |                         | 53.2 (90.3)             |                         |
|                                                          | REM      | 42.6 (162.4)            |                         | 113.0 (203.1)           |                         |
| Initial response                                         | stage N3 | 2.3 (2.7)               |                         | 3.7 (4.0)               |                         |
|                                                          | stage N2 | 2.1 (2.2)               |                         | 2.2 (1.9)               |                         |
|                                                          | REM      | 2.8 (2.8)               |                         | 4.7 (3.3)               |                         |
| Delayed response                                         | stage N3 | 4.5 (4.9)               |                         | 5.9 (4.1)               |                         |
|                                                          | stage N2 | 3.6 (3.6)               |                         | 4.5 (3.4)               |                         |
|                                                          | REM      | 5.6 (4.1)               |                         | 7.5 (5.8)               |                         |

Area under the curve (AuC), number of event related awakenings, initial and delayed maximal increase of heart rate (HR) and number of participants with an event related change of HR of at least 3bpm are presented for each of the four experimental nights. AuC, initial and delayed maximal increase of HR are presented for the combined low and high vibration condition. Cave:

1  
2  
3 *the initial and delayed response is calculated as maximal increase within the first 10 to 15 or 20*  
4 *to 48 seconds after train onset. This difference in search area explains partly the differences*  
5 *between the initial and delayed increase of HR.*  
6  
7  
8  
9  
10  
11  
12  
13  
14  
15  
16  
17  
18  
19  
20  
21  
22  
23  
24  
25  
26  
27  
28  
29  
30  
31  
32  
33  
34  
35  
36  
37  
38  
39  
40  
41  
42  
43  
44  
45  
46  
47  
48  
49  
50  
51  
52  
53  
54  
55  
56  
57  
58  
59  
60

For peer review only

TABLE 3: Train related HR characteristics in relation to gender and noise sensitivity of the participants.

|                   |                    |                  | Low vibration | High vibration |
|-------------------|--------------------|------------------|---------------|----------------|
|                   |                    |                  | Mean (SD)     | Mean (SD)      |
| Gender            | Men N=11           | AuC              | 48.1 (73.0)   | 81.2 (96.8)    |
|                   |                    | Initial response | 1.7 (1.4)     | 2.0 (1.9)      |
|                   |                    | Delayed response | 3.5 (2.8)     | 4.8 (3.7)      |
|                   | Women N=13         | AuC              | -1.6 (84.6)   | 46.2 (65.4)    |
|                   |                    | Initial response | 1.5 (2.1)     | 2.6 (2.2)      |
|                   |                    | Delayed response | 1.8 (1.7)     | 2.8 (1.5)      |
| Noise sensitivity | Non sensitive N=14 | AuC              | 24.0 (62.0)   | 63.8 (93.3)    |
|                   |                    | Initial response | 1.1 (1.3)     | 2.0 (2.0)      |
|                   |                    | Delayed response | 2.3 (2.0)     | 4.0 (3.4)      |
|                   | Sensitive N=10     | AuC              | 17.2 (107.3)  | 60.1 (65.9)    |
|                   |                    | Initial response | 2.4 (2.2)     | 2.8 (2.1)      |
|                   |                    | Delayed response | 3.0 (2.9)     | 3.4 (2.0)      |

## Figure Legends

*FIGURE 1. Visualization of the analytical procedure. For each of the four experimental nights, HR data is taken out for each of the train-events (black lines of the events per night) for each participant. Data is checked for artifacts and wake stage and then sampled into one average HR response for each participant with corresponding initial maximum, delayed maximum and area under the curve parameters. The grand average is built over all of the participants. The very same procedure is applied to the fake events (grey lines of the events per night).*

*FIGURE 2. A) Averaged HR response following the train events and fake events, respectively, in the low and high vibration exposure. In figure 1A, a clear HR increase after train events can be seen, while HR stays at baseline for fake events. The HR response can be divided into two components. An initial response occurring around 10 to 15 seconds after train onset and a delayed response occurring about 17 to 48 sec after train onset. The delayed response is significantly enhanced in the high vs. low vibration exposure. In figure 1B the averaged HR reaction in the high vibration condition is visualized for each of the five different train types. Although the different number of trains does not allow direct comparison, it can be seen, that in principal the same characteristics of the HR reaction is apparent for each train.*

For peer review only

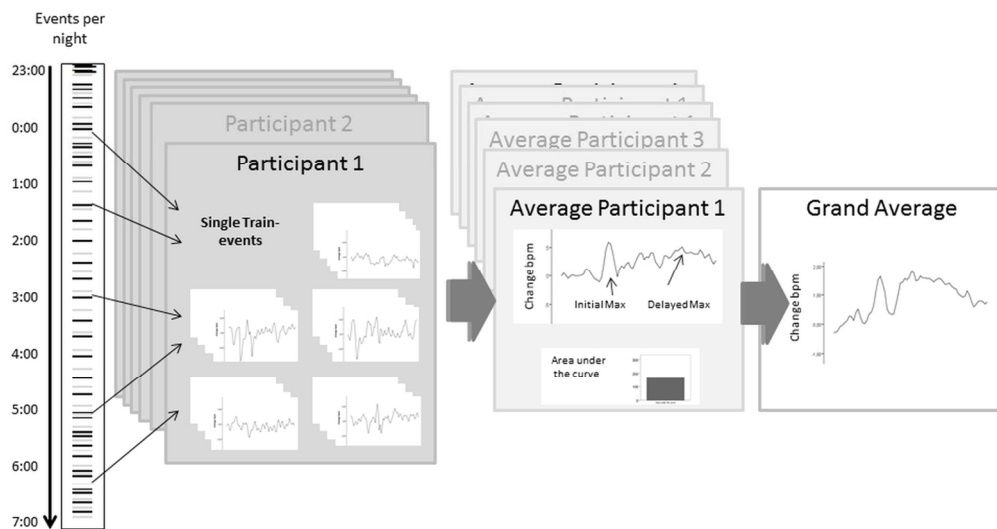

FIGURE 1. Visualization of the analytical procedure. For each of the four experimental nights, HR data is taken out for each of the train-events (black lines of the events per night) for each participant. Data is checked for artifacts and wake stage and then sampled into one average HR response for each participant with corresponding initial maximum, delayed maximum and area under the curve parameters. The grand average is built over all of the participants. The very same procedure is applied to the fake events (grey lines of the events per night).  
 119x90mm (300 x 300 DPI)

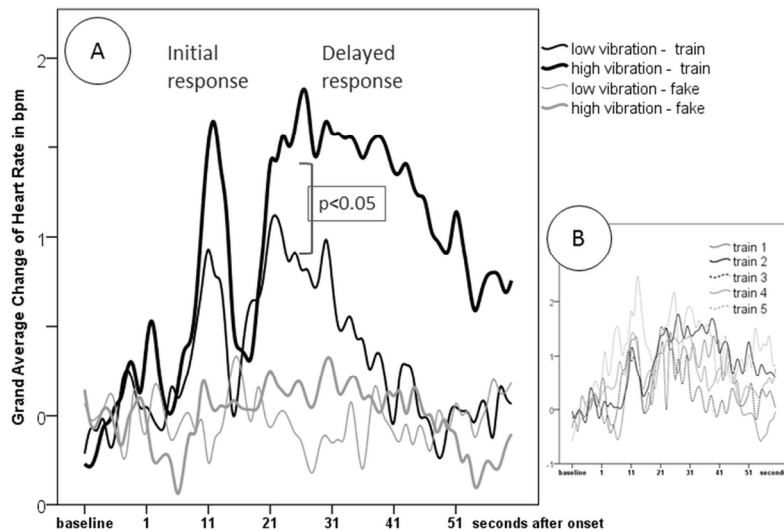

FIGURE 2. A) Averaged HR response following the train events and fake events, respectively, in the low and high vibration exposure. In figure 1A, a clear HR increase after train events can be seen, while HR stays at baseline for fake events. The HR response can be divided into two components. An initial response occurring around 10 to 15 seconds after train onset and a delayed response occurring about 17 to 48 sec after train onset. The delayed response is significantly enhanced in the high vs. low vibration exposure. In figure 1B the averaged HR reaction in the high vibration condition is visualized for each of the five different train types. Although the different number of trains does not allow direct comparison, it can be seen, that in principal the same characteristics of the HR reaction is apparent for each train.

90x127mm (300 x 300 DPI)

# Effects of train noise and vibration on human heart rate during sleep –an experimental study

---

**Authors:** Dr. Ilona Croy<sup>1</sup>; Michael Smith<sup>1</sup>,MSc; Prof. Kerstin Persson Waye<sup>1</sup>

<sup>1</sup>University of Gothenburg, Department of Occupational and Environmental Medicine, University of Gothenburg, Medicinaregatan 16, 405 30 Göteborg, Sweden

**Corresponding author:**

Dr. Ilona Croy  
Occupational and Environmental Medicine  
Medicaregatan 16  
University of Gothenburg  
Box 414, 405 30 Göteborg, Sweden  
+46 (0)31 786 6814  
Ilona.croy@amm.gu.se

**Words:** 3914

**Figures:** 2

**Tables:** 3

**Short title:** Freight train effects on nocturnal heart rate

**Keywords:** train, autonomic arousals, heart rate, noise, sleep, vibration

**Acknowledgements:**

The authors wish to thank the volunteers for participation in the study. We are grateful to Agneta Agge, Mikael Ögren, Sofie Fredriksson and Josefine Larsson for their valuable assistance in conducting the trial. The study was supported by the EU FP7 funded Cargovibes Project.

**Data sharing statement:** Extra data is available by emailing Ilona Croy.

**Financial interests:** None of the authors declare a conflict of interest.

## Abstract

Objectives: Transportation of goods on railways is increasing and the majority of the increased numbers of freight trains run during the night. Transportation noise has adverse effects on sleep structure, affects heart rate during sleep and **may be linked** to cardiovascular disease. Freight trains also generate vibration and little is known regarding the impact of vibration on human sleep. A laboratory study was conducted to examine how a realistic nocturnal railway traffic scenario influences the heart rate (HR) during sleep.

Methods: Twenty four volunteers slept in the laboratory for six consecutive nights: one habituation night, one control and four experimental nights in which train noise and vibration was reproduced. In the experimental nights, 20 or 36 trains with low or high vibration characteristics were presented. Polysomnographical data and ECG were recorded.

Results: The train exposure lead to a significant change of HR within one minute of exposure onset ( $p=0.002$ ), characterized by an initial and a delayed increase of HR. The high vibration condition provoked an average increase of at least 3bpm per train in 79% if the participants. Cardiac responses were in general higher in the high vibration compared to the low vibration condition ( $p=0.006$ ). No significant effect of noise sensitivity and gender was revealed, although there was a tendency for men to exhibit stronger HR acceleration then women.

Conclusions: Freight trains provoke HR accelerations during sleep, and the vibration characteristics of the trains are of special importance. In long term, this may affect cardiovascular functioning of persons living close to railways.



### Article summary

#### Article Focus:

Noise of passing trains affects sleep and induces heart rate accelerations in humans. **This may be linked to cardiovascular disease.** Trains do not only emit noise, but also vibration and the influence of vibration is poorly understood.

#### Key message:

Our study shows, that freight train noise and vibration provokes heart rate accelerations in sleep. The HR response is characterized by two peaks, whereby the second one is even more pronounced and may dependent on the vibration amplitude.

#### Strengths and limitations:

The influence of nocturnal vibration on HR response has been studied for the first time under very well controlled laboratory conditions. However further studies with increased sample size should be carried out to analyze the influence of gender, age and sensitivity in more detail.

## Introduction

As the European market share of freight traffic is expected to increase from 8% in 2001 to 15% in 2020 [1], it is important to estimate the impact this may have on the health of persons living close by to railway lines. Railway noise is related to disturbed sleep [2-6] which in turn **increases the risk of cardiovascular disease [7], supported by** indications of increased cardiovascular disease in persons living close to railways [8]. **Understanding how railway noise and vibration influence the cardiovascular system in sleep is therefore necessary.**

**The sympathetic tone is reduced in sleep which is reflected by a reduction of heart rate (HR) [9]. External noise events have the potential to disturb sleep and lead to event related increase of heart rate. This has been shown for pure tones [10] and more recently for traffic noise [11 12]. Noise induced HR changes do not seem to habituate during sleep [13], therefore they might “bear a pathogenic potential for the genesis of cardiovascular disease” [11]. Evidence that long term traffic exposure can increase the risk for cardiovascular disease comes from field studies.**

1  
2  
3 Babisch summarizes that traffic exposure enhances the risk for hypertension by a factor of  
4  
5 between 1.5 to 3 [14]. An increased risk for myocardial infarction in persons living close to  
6  
7 railways has been found in several studies [15-18], although the effect sizes are rather small and  
8  
9 the effects seem to be more pronounced in men [15 16 18].  
10  
11

12 Traffic noise influences sleeping structure [19] and leads to increased awakenings [19 20]  
13  
14 throughout the night. People living close to busy roads and railways or in close proximity to  
15  
16 airports therefore often report poor sleep quality [3 4 6]. A Dutch study revealed that the number  
17  
18 of persons reporting strong difficulties falling asleep due to traffic noise increased from 18% to  
19  
20 23% between 1998 and 2003 [21]. Disturbed sleep might be one factor leading to enhanced  
21  
22 cardiovascular risk in persons exposed to traffic. It has been suggested that sleep disturbances  
23  
24 contribute to cardiovascular disease through the pathway of enhanced inflammatory processes  
25  
26 [22] or, related to this, through the pathway of enhanced stress reaction affecting the  
27  
28 cardiovascular system [23]. In a field study, Carter et al examined the influence of nocturnal  
29  
30 traffic exposure on 7 older men with cardiac arrhythmia, who lived close to a busy road [24].  
31  
32 They found an increased likelihood of single ventricular premature contractions (a form of  
33  
34 cardiac arrhythmia) after noise peaks.  
35  
36  
37  
38  
39

40  
41 Two environmental exposures commonly arising from traffic are noise and vibration. As  
42  
43 described, traffic noise disturbs sleep and leads to event related HR changes, but the effect of  
44  
45 traffic vibration is not well understood. Studies investigating annoyance show that 1) traffic  
46  
47 vibration causes annoyance, 2) annoyance increases with increasing vibration level and 3)  
48  
49 vibration enhances the annoying effect of noise [25-27]. Furthermore, higher vibration amplitude  
50  
51 is related to higher reported sleep disturbances in persons exposed to railway traffic [6]. A study  
52  
53 on human fetuses suggests that short experimental external vibration exposure alters sleep stage  
54  
55 [28]. Indications that vibration exposure is disadvantageous for cardiovascular function have  
56  
57 been found in people exposed to high levels of vibration at work [29 30].  
58  
59  
60

1  
2  
3 The effect of combined traffic vibration and noise on the cardiovascular system in sleep has - to  
4  
5 our best knowledge - not been examined. It is the aim of the present study to detect if nocturnal  
6  
7 noise and vibration exposure from freight trains provoke HR accelerations.  
8  
9

## 10 11 12 **Methods**

### 13 14 15 **Participants and procedure**

16  
17  
18 Twenty four volunteers (11 men, 13 women, 19-28 years, mean age 22.9+/- 2.8years) slept in our  
19  
20 sleep laboratory. Twenty three were students and one was in full-time employment, recruited by  
21  
22 public advertisements placed around the campus of the University of Gothenburg. Eligible  
23  
24 persons were required to be aged between 18 and 30 years, in healthy condition, maintain normal  
25  
26 sleeping patterns and not use tobacco products. To decrease the probability of subclinical  
27  
28 breathing difficulties or apnea, participants were required to have a BMI within the normal range  
29  
30 of 18.5 - 24.99 [31]. Following initial screening, hearing was tested before volunteers were  
31  
32 accepted. Manual audiometric testing was conducted using an Entomed SA201<sup>II</sup> according to  
33  
34 ISO 8253-1. Left and right ears were tested separately at frequencies of 250, 500, 1000, 2000,  
35  
36 3000, 4000, 6000 and 8000 Hz with hearing considered to be normal if measured thresholds were  
37  
38 not more than a screening level of 20 dB HL.  
39  
40  
41  
42  
43  
44

45  
46 The participants were instructed to begin attempting to fall asleep at 23:00 each night, were  
47  
48 awoken by an alarm call at 07:00 each morning, and were prohibited from sleeping outside of  
49  
50 this period. Before attending they were asked about their noise sensitivity on a 5-point Likert  
51  
52 scale. Fourteen participants (8 men, 6 women) rated themselves as being noise insensitive (points  
53  
54 1-2) and 10 rated themselves being noise sensitive (points 3-5). For each participant, the study  
55  
56 consisted of one habituation night and one control night proceeding four experimental nights in  
57  
58 which simulated trains passed. The arrangement of the experimental nights was randomized  
59  
60

1  
2  
3 across participants. Gender and noise sensitivity were approximately equally spread around the  
4 randomization table. In two of the four experimental nights, the participants were exposed to 20  
5 trains per night with all trains having high vibration one night and low vibration in the other  
6 (High20 and Low20 respectively). In the remaining two nights they were exposed to 36 trains per  
7 night again with either high or low vibrations (High36 and Low36). The acoustic signal for the  
8 trains was not varied with vibration amplitude. There were more train passages between the  
9 periods of 23:00-01:00 and 05:00-07:00 to reflect typical real world scenarios.  
10  
11  
12  
13  
14  
15  
16  
17  
18

19  
20 The sleep laboratory consists of three individual rooms isolated from external noise and  
21 vibration, furnished to simulate a typical bedroom with a bed, chairs, desk and small chest of  
22 drawers. Eighty eight ceiling loudspeakers reproduced the low frequency content of noise below  
23 125 Hz, and higher frequencies were generated by two loudspeaker cabinets in the room corners.  
24  
25 Because of the unrealistically low background noise levels in the rooms (<14 dBA), for the  
26 duration of the trial artificial ventilation noise was introduced at a level of 25 dBA measured at  
27 the pillow position on the bed. In addition to the bedrooms the participants had private access to  
28 a shared a communal space outfitted with a kitchen, dining area and living area with sofa and  
29 television. They were free to come and go as they desired during the daytime, being required to  
30 arrive by 20:00 each evening to ensure rest prior to bedtime and to allow sufficient time for  
31 electrode attachment.  
32  
33  
34  
35  
36  
37  
38  
39  
40  
41  
42  
43  
44  
45  
46

47 Vibration and noise exposure were similar to another study conducted in our laboratory [32] and  
48 are only summarized here. Five different train passages were synthesized based upon analysis of  
49 accelerometer and sound level measurements performed in the field. Noise signals were low pass  
50 filtered to correspond to a fully closed window. The vibration exposure was an amplitude  
51 modulated 10 Hz signal applied along the lengthwise horizontal axis of the bed by  
52 electrodynamic shakers with a frequency response of 5-40 Hz mounted to the underside of the  
53 bed frame. The vibration began when the train noise signal exceeded an A-weighted equivalent  
54  
55  
56  
57  
58  
59  
60

1  
2  
3 level ( $L_{Aeq}$ ) of 35 dB, ensuring masking of any audible mechanical operation noise. Further  
4  
5 acoustic and vibration data for each individual train is presented in Table 1.  
6  
7

### 8 9 **Ethics Statement**

10  
11 The study followed the Declaration of Helsinki on Biomedical Research Involving Human  
12  
13 Subjects and was approved by the Ethics Committee from the University of Göteborg (920-11).  
14  
15 All participants provided written informed consent.  
16  
17

### 18 19 **Cardiac response and polysomnography**

20  
21 During all experimental nights, physiological data was recorded using ambulatory  
22  
23 polysomnogram devices (SOMNOscreen plus PSG+, SOMNOmedics GmbH, Germany). The  
24  
25 time resolution of the onset was 4.7+/- 3.4 seconds.  
26  
27

28  
29 Cardiac activity was recorded via a modified lead II torso placement electrocardiogram (ECG) at  
30  
31 a sampling frequency of 256 Hz as per the American Academy of Sleep Medicine [33]. To  
32  
33 identify sleep stage, electroencephalogram (EEG), electrooculogram (EOG) and submental  
34  
35 electromyogram (EMG) were also recorded using standardized surface electrode placements and  
36  
37 sampling and filter frequencies. To ensure good signal quality, following electrode attachment it  
38  
39 was checked that the electrical impedance of each contact was  $\leq 5k\Omega$ . Thirty second epoch sleep  
40  
41 staging was performed manually by a trained sleep technicians. Additionally, participants wore  
42  
43 two effort belts to record breathing rates and a finger pulse oximeter to record blood oxygen  
44  
45 saturation, plethysmogram and pulse information, although this data ~~shall~~ will not be reported  
46  
47 here. Due to a technical fault, ECG was not ~~recorded~~ obtained for one participant (female, noise  
48  
49 sensitive) in the High20 night and so could not be included in analysis.  
50  
51  
52  
53  
54  
55

### 56 57 **Event related analysis and control condition**

58  
59 In order to examine event related changes of HR, data from the four exposure nights was  
60  
analyzed. The continuously recorded ECG (sampling frequency of 256Hz) was converted into

1  
2  
3 HR (in bpm) in 1s intervals through the whole night. EEG and ECG recordings were  
4  
5 synchronized with the train exposure events, thus allowing a direct temporal association between  
6  
7 the occurrence of a train and the participant's HR reaction and sleep stages. Analysis revealed  
8  
9 that 9.9% of the train onsets occurred during wake stage, 8.1% during stage N1, 42% during  
10  
11 stage N2, 21.4% during stage N3 and 17.8% during REM.  
12

13  
14 The procedure of HR analysis is visualized in Figure 1. HRs below 35 and above 130bpm were  
15  
16 excluded from the analysis [11 34]. This was the case for 4.1% of the events. For analysis of  
17  
18 event related HR change (bpm), only train events where participants were asleep were  
19  
20 considered. This approach was chosen because Griefahn and colleagues showed that HR  
21  
22 response to traffic noise differs depending on whether the participants do or do not awake [11].  
23  
24 The relatively few trains per night in our study do not allow additional examination of HR  
25  
26 response in the case of awakenings. An event related awakening has been defined as a sleep  
27  
28 stage change to Wake from any other stage in at least one of the two epochs (30s) following the  
29  
30 train onset [35]. The first of these was determined by that having at least 15s under influence of  
31  
32 the event. Additionally, events for which the participants were awake in the epoch preceding  
33  
34 train onset were excluded from the analysis. The whole procedure left 72.4% of the train events  
35  
36 in the low vibration condition and 66.1% of the train events in the high vibration condition for  
37  
38 analysis. In accordance with the literature, the screening interval for cardiac activations was set  
39  
40 to 60s after train onset [11 34]. In order to analyze change of HR, the average cardiac response  
41  
42 from the 10s preceding the train event was used as a baseline value for each given event and  
43  
44 subsequently subtracted from the cardiac response in each of the sixty 1s time intervals following  
45  
46 the train onset.  
47  
48

49  
50 In order to examine if there was a train related change of HR at all, '*fake trains*' were calculated.  
51  
52 Fake trains were defined as time intervals of 60s not accompanied by a real train event,  
53  
54 distributed at time intervals approximately equally spaced between the actual exposure events.  
55  
56  
57  
58  
59  
60

1  
2  
3 Twenty of these were introduced in the Low20 and High20 nights and 36 in the Low36 and  
4 High36 nights. . Analyzed HR data for these consisted of 70s, where 10s served as baseline for  
5 the following 60s. As with the real exposures, data where polysomnographical analysis indicated  
6 that participants were awake before onset or awoke during the two epochs following onset was  
7 excluded. All event-related 60s periods were subsequently averaged over nights with low or high  
8 vibration respectively. **The whole procedure was the same for each of the four nights to avoid any**  
9 **potential investigator bias.**

10 Griefahn and colleagues report a maximum increase of HR about 13.2s after event onset [11].  
11 We took this time interval +/- 3s as a base for the searching area for the maximum increase  
12 between 10 and 16s after train onset.  
13  
14  
15  
16  
17  
18  
19

### 20 **Statistical analysis**

21 Data was analyzed using SPSS 20 (SPSS Inc., Ill, USA). In order to identify any overall effect of  
22 trains on the HR, the integral of the HR response was taken to determine the area under the curve (AuC)  
23 for the 60s after train onset. An Analysis of Variance (ANOVA) for repeated measurements was  
24 calculated comparing the AuC in three factors: event (fake vs. real-train), vibration level (low vs.  
25 high) and number of trains (20 vs. 36). The effects of noise sensitivity and gender were also  
26 analyzed using ANOVA for repeated measurements with the between subject factor noise  
27 sensitivity/gender and the within subject factor vibration level (low vs. high). Post-hoc-  
28 comparisons are reported Bonferroni-corrected. The level of significance is set at  $\alpha=0.05$ .  
29  
30  
31  
32  
33  
34  
35  
36  
37  
38  
39  
40  
41  
42  
43  
44  
45  
46  
47  
48  
49  
50  
51  
52  
53  
54  
55  
56  
57  
58  
59  
60

## Results

### Influence of train noise and vibration on HR

The AuC analysis for the change of HR 60s after event onset revealed a significant main effect of train, indicating that *train events lead to an enhanced change of HR compared with the fake events* ( $F_{22,1}=12.0$ ,  $p=0.002$ ). Furthermore there were significantly more awakenings in the train vs. fake events ( $F_{22,1}=40.3$ ,  $p<0.001$ ).

There was a *significant main effect of vibration level*. A higher change of HR and an increased number of awakenings could be observed in the high compared to the low vibration level (HR:  $F_{22,1}=7.6$ ;  $p=0.01$ ; Awakenings:  $F_{22,1}=6.5$ ;  $p=0.014$ ). The number of trains had no significant influence on the HR change. The results are displayed in table 2.

Averaged over all trains within one night, an *increase of HR of at least 3bpm* was observed in 54% of the participants in Low36, 52% in the Low20 condition, 74% in the High20 night and 79% of participants in the High36 night. For the fake train events an average increase of HR of at least 3 bpm was observed in only 17 to 38% of the participants, depending on the exposure night.

As no significant influence of the number of trains was revealed, the four exposure conditions were combined into two conditions: a high vibration and a low vibration condition. This approach is advantageous for the signal-noise ratio, because in this way the number of analyzable trains could be increased to 56. For calculating the low vibration condition, train events from the Low20 and Low36 nights that matched the inclusion criteria described in the methods section were averaged to obtain one low vibration response. The same method was performed for the high vibration condition. This procedure was repeated for the fake events, so that resulting responses for the low and high vibration exposures for both the actual and phantom events could be compared.



### Characteristics of the HR curve

The HR curve shows a biphasic characteristic (see figure 2A). After approximately 9s a short initial response characterized by increase of HR takes place, lasting for around 6s. This *initial response* is significantly above the baseline between 10-13s for the low vibration condition, and between 10-15s for the high vibration condition (t-test,  $p<0.05$ ). This response is in accordance with the proposed search area of the maximum increase.

An additional *delayed response* can also be observed. This response is characterized by a second increase of HR beginning around 17s following train onset and with a duration of around 20s for the low vibration condition and about 30s for the high vibration condition. The delayed response is significantly above baseline between 21-22s for the low vibration condition, and between 20-48s for the high vibration condition (t-test,  $p<0.05$ ). This same response could be seen for each of the five individual train types (see figure 2B)

This response pattern could be observed in the individual participants, but the time delay after event onset showed a great variability. The individual maximum for each participant within the range of the initial response (10-15s) and the delayed response (17-50s) was calculated and is reported in table 2.

For the **initial response and for the delayed response**, ANOVA for repeated measurements revealed a significant main effect of event, indicating that the *train-events led to an enhanced change of HR compared with the fake-events* (initial response:  $F_{23,1}=13$ ,  $p=0.001$ ; delayed response:  $F_{23,1}=15.5$ ,  $p=0.001$ ).

The vibration level had no significant influence on the initial increase of HR ( $F_{23,1}=2.1$ , n.s.), but affected the delayed response. A higher delayed increase of HR was observed in the high compared to the low vibration level ( $F_{23,1}=9.4$ ,  $p=0.006$ ).

### Effect of order

The participant's HR responses of the four nights were compared with respect to the order of experimental nights using ANOVA for repeated measurements. There was no significant influence of order of experimental nights on the AuC response ( $F_{22,3} = 1.7$ , n.s.), nor for the initial ( $F_{22,3} = 2.0$ , n.s.) or delayed response ( $F_{22,3} = 0.8$ ).

### Influence of sleep stage

The AuC, the initial maxima and the delayed maxima were compared in the sleep stages N3, N2 and REM. For wake stage and for stage N1 there were too few events to allow for comparison.

The results are presented in table 2.

ANOVA for repeated measurements using the within subject factors sleep stage (stages N3, N2 and REM) and vibration level (low vs. high) was calculated.

The overall AuC revealed no significant influence of sleep stage ( $F_{23,2} = 1.1$ , n.s.). The **initial response** revealed a significant influence of sleep stage ( $F_{23,2} = 5.1$   $p = 0.009$ ). Bonferroni-corrected post-hoc comparison reveals that the initial increase of HR was significantly higher in REM than in stage N2 sleep ( $p = 0.002$ ). The same significant pattern was seen in the **delayed response** ( $F_{23,2} = 4.8$   $p = 0.013$ ). Here again post-hoc comparison showed that HR increase was higher in REM sleep than in stage N2 ( $p = 0.017$ ).

### Influence of Noise sensitivity and gender

**Effect of sensitivity.** The AuC, initial maxima and delayed maxima of HR change are compared between participants with low ( $N = 14$ ) and high ( $N = 10$ ) noise sensitivity. The results are displayed in table 3. No significant main effects of noise sensitivity were found in the AuC ( $F_{22,1} = 0.007$ , n.s.) nor in the initial ( $F_{22,1} = 2.8$ , n.s.) or delayed response ( $F_{22,1} = 0.004$ , n.s.).

There were no significant interactions between noise sensitivity and vibration level.

1  
2  
3  
4  
5  
6 **Effect of gender.** The results of comparisons between men (N=11) and women (N=13) are  
7  
8 shown in table 3. No significant differences were found in the AuC ( $F_{22,1}=2.5$ , n.s.) or in the  
9  
10 HR initial ( $F_{22,1}=0.5$ , n.s.) between genders. There was a tendency for men to exhibit a stronger  
11  
12 increase of HR in the delayed response ( $F_{22,1}=4.1$ ,  $p=0.055$ ).  
13  
14

## 15 16 17 **Discussion**

18  
19  
20 Our data shows that train noise and vibration exposure leads to an **increased number of**  
21  
22 **awakenings** and to cardiac arousals, and that vibration might be of particular importance. Heart  
23  
24 rate acceleration with two maxima was observed following trains noise and vibration. One rapid  
25  
26 and distinct initial HR increase is evident around 9s after train onset and a lengthier delayed  
27  
28 increase is observed starting about 17s after train onset. In a similar study dealing with traffic  
29  
30 noise alone, Griefahn et al [11] found an increase of HR matching our initial response but no  
31  
32 delayed increase. A similar initial increase of HR has been found for pure tones during sleep  
33  
34 [36]. We propose that the second plateau is due to the additional vibration exposure, which  
35  
36 seems to either act in isolation to result in cardiac response, or alternatively enhance or interact  
37  
38 with any delayed effects of rail noise on HR. Supporting this interpretation we see a significant  
39  
40 difference between the low and the high vibration level for the delayed, but not for the initial  
41  
42 increase. The combined exposure might be a more pronounced alarming signal than noise alone  
43  
44 and the HR alterations endure even after cessation of the actual exposure. In accordance with  
45  
46 previous literature on sleep disturbance due to noise exposure [10-12], the highest alterations of  
47  
48 HR were found in REM sleep. This was observed for both the initial and delayed response.  
49  
50  
51  
52  
53  
54

55  
56 Cardiac arousals are likely induced by brain stem activation [37]. This subcortical activation may  
57  
58 present a form of primary arousal in sleep and - depending on the strength of activation and on  
59  
60 sleep stage - lead to cortical activation and arousal. Increased HR indicates subcortical arousal

1  
2  
3 and enhances the probability of a cortical arousal with implications for sleep structure [37].  
4  
5 However, even HR acceleration without concomitant cortical arousal has been shown to have  
6  
7 adverse effects on sleep structure. Guilleminault et al showed that forced subcortical arousals  
8  
9 accompany disturbed sleep and the persons are not necessarily aware of their disturbed sleep the  
10  
11 following morning [38].  
12  
13

14  
15  
16 In the short term, arousals have positive effects by ensuring a higher level of behavioral  
17  
18 responsiveness in the presence of external stimuli, while the sleep is protected as far as possible  
19  
20 [39]. However, in the long term increased autonomic reaction might be harmful. As Kohler and  
21  
22 Stradling point out in a review paper, recurrent arousals are one of the mechanisms leading to  
23  
24 cardiovascular disease in obstructive sleep apnea [40]. In this manner the autonomic arousals  
25  
26 provoked by passing trains may - if continuing over years - contribute to the slightly enhanced  
27  
28 myocardial infarction risk that has been found in people living in areas with high traffic exposure  
29  
30 [15-18]. The study of Tassi et al suggests that people living in areas with high railway noise for  
31  
32 more than ten years can partly adjust their sleep to this adverse exposure. However, even after  
33  
34 such long-term exposure, significant alterations of HR due to nocturnal railway have been found  
35  
36 [5]. In epidemiological studies, the effects of noise exposure alone are rather small [15-18]. Our  
37  
38 data suggests that the effect of chronic traffic exposure on cardiovascular disease might be higher  
39  
40 if vibration is additionally taken into account. As described in the methods of this paper, we  
41  
42 excluded events from the analysis where persons awoke. This approach allows a focused  
43  
44 estimation of HR reaction from traffic noise during sleep. However, as HR reactions are usually  
45  
46 greater if accompanied by awakenings [11], our results very likely underestimate the effects. **We**  
47  
48 **found an average train-related increase of 3bpm in 79% of participants, supporting previously**  
49  
50 **reported data [10]. It is not possible with the present study design to estimate the clinical**  
51  
52 **relevance of these results. However, an increase of HR in sleep perhaps reflects a higher**  
53  
54  
55  
56  
57  
58  
59  
60

1  
2  
3 sympathetic tone [9] and this may contribute to the enhanced the risk for hypertension in long  
4  
5 term traffic exposure [14].  
6  
7

8  
9 Our results are less clear regarding the impact of interindividual differences. Previous  
10 epidemiological research has shown that persons who state being sensitive to noise report greater  
11 sleeping problems due to traffic than non-sensitive persons [41]. However, we found no  
12 significant effect of self-reported noise sensitivity on HR response towards nocturnal train  
13 events. During the day it has been shown that self-declared highly noise sensitive persons have  
14 higher cardiovascular responses towards different ecologically relevant sound, including traffic  
15 noise [13]. The sample size of sensitive and non-sensitive participants in our study is relatively  
16 small and therefore non-significant results in particular have to be interpreted with caution. The  
17 sample size also limits any interpretation of gender effects. In coherence with the study of  
18 Griefahn, we found no significant gender differences in the initial HR amplitude [11]. We found  
19 a tendency for enhanced delayed HR response in men with a rather strong effect size. This  
20 corresponds to results from several field studies, where enhanced traffic exposure related  
21 cardiovascular diseases were found in men [15 16 18].  
22  
23  
24  
25  
26  
27  
28  
29  
30  
31  
32  
33  
34  
35  
36  
37  
38

39  
40 We are aware of the limitations of the study: Regarding internal validity, the time resolution of  
41 the measurement could potentially lead to a smoothing of the averaged data, underestimating our  
42 results. Nevertheless, a clear effect of enhanced HR reaction in high vibration conditions can be  
43 seen. We argue that vibration exposure is responsible for the second plateau. However, a  
44 vibration alone condition i.e. in the absence of noise, is needed to confirm this. With respect to  
45 external validity, the study is limited to the homogenous group of young and healthy participants.  
46  
47  
48  
49  
50  
51  
52  
53  
54  
55  
56  
57  
58  
59  
60  
61  
62  
63  
64  
65  
66  
67  
68  
69  
70  
71  
72  
73  
74  
75  
76  
77  
78  
79  
80  
81  
82  
83  
84  
85  
86  
87  
88  
89  
90  
91  
92  
93  
94  
95  
96  
97  
98  
99  
100  
101  
102  
103  
104  
105  
106  
107  
108  
109  
110  
111  
112  
113  
114  
115  
116  
117  
118  
119  
120  
121  
122  
123  
124  
125  
126  
127  
128  
129  
130  
131  
132  
133  
134  
135  
136  
137  
138  
139  
140  
141  
142  
143  
144  
145  
146  
147  
148  
149  
150  
151  
152  
153  
154  
155  
156  
157  
158  
159  
160  
161  
162  
163  
164  
165  
166  
167  
168  
169  
170  
171  
172  
173  
174  
175  
176  
177  
178  
179  
180  
181  
182  
183  
184  
185  
186  
187  
188  
189  
190  
191  
192  
193  
194  
195  
196  
197  
198  
199  
200  
201  
202  
203  
204  
205  
206  
207  
208  
209  
210  
211  
212  
213  
214  
215  
216  
217  
218  
219  
220  
221  
222  
223  
224  
225  
226  
227  
228  
229  
230  
231  
232  
233  
234  
235  
236  
237  
238  
239  
240  
241  
242  
243  
244  
245  
246  
247  
248  
249  
250  
251  
252  
253  
254  
255  
256  
257  
258  
259  
260  
261  
262  
263  
264  
265  
266  
267  
268  
269  
270  
271  
272  
273  
274  
275  
276  
277  
278  
279  
280  
281  
282  
283  
284  
285  
286  
287  
288  
289  
290  
291  
292  
293  
294  
295  
296  
297  
298  
299  
300  
301  
302  
303  
304  
305  
306  
307  
308  
309  
310  
311  
312  
313  
314  
315  
316  
317  
318  
319  
320  
321  
322  
323  
324  
325  
326  
327  
328  
329  
330  
331  
332  
333  
334  
335  
336  
337  
338  
339  
340  
341  
342  
343  
344  
345  
346  
347  
348  
349  
350  
351  
352  
353  
354  
355  
356  
357  
358  
359  
360  
361  
362  
363  
364  
365  
366  
367  
368  
369  
370  
371  
372  
373  
374  
375  
376  
377  
378  
379  
380  
381  
382  
383  
384  
385  
386  
387  
388  
389  
390  
391  
392  
393  
394  
395  
396  
397  
398  
399  
400  
401  
402  
403  
404  
405  
406  
407  
408  
409  
410  
411  
412  
413  
414  
415  
416  
417  
418  
419  
420  
421  
422  
423  
424  
425  
426  
427  
428  
429  
430  
431  
432  
433  
434  
435  
436  
437  
438  
439  
440  
441  
442  
443  
444  
445  
446  
447  
448  
449  
450  
451  
452  
453  
454  
455  
456  
457  
458  
459  
460  
461  
462  
463  
464  
465  
466  
467  
468  
469  
470  
471  
472  
473  
474  
475  
476  
477  
478  
479  
480  
481  
482  
483  
484  
485  
486  
487  
488  
489  
490  
491  
492  
493  
494  
495  
496  
497  
498  
499  
500  
501  
502  
503  
504  
505  
506  
507  
508  
509  
510  
511  
512  
513  
514  
515  
516  
517  
518  
519  
520  
521  
522  
523  
524  
525  
526  
527  
528  
529  
530  
531  
532  
533  
534  
535  
536  
537  
538  
539  
540  
541  
542  
543  
544  
545  
546  
547  
548  
549  
550  
551  
552  
553  
554  
555  
556  
557  
558  
559  
560  
561  
562  
563  
564  
565  
566  
567  
568  
569  
570  
571  
572  
573  
574  
575  
576  
577  
578  
579  
580  
581  
582  
583  
584  
585  
586  
587  
588  
589  
590  
591  
592  
593  
594  
595  
596  
597  
598  
599  
600  
601  
602  
603  
604  
605  
606  
607  
608  
609  
610  
611  
612  
613  
614  
615  
616  
617  
618  
619  
620  
621  
622  
623  
624  
625  
626  
627  
628  
629  
630  
631  
632  
633  
634  
635  
636  
637  
638  
639  
640  
641  
642  
643  
644  
645  
646  
647  
648  
649  
650  
651  
652  
653  
654  
655  
656  
657  
658  
659  
660  
661  
662  
663  
664  
665  
666  
667  
668  
669  
670  
671  
672  
673  
674  
675  
676  
677  
678  
679  
680  
681  
682  
683  
684  
685  
686  
687  
688  
689  
690  
691  
692  
693  
694  
695  
696  
697  
698  
699  
700  
701  
702  
703  
704  
705  
706  
707  
708  
709  
710  
711  
712  
713  
714  
715  
716  
717  
718  
719  
720  
721  
722  
723  
724  
725  
726  
727  
728  
729  
730  
731  
732  
733  
734  
735  
736  
737  
738  
739  
740  
741  
742  
743  
744  
745  
746  
747  
748  
749  
750  
751  
752  
753  
754  
755  
756  
757  
758  
759  
760  
761  
762  
763  
764  
765  
766  
767  
768  
769  
770  
771  
772  
773  
774  
775  
776  
777  
778  
779  
780  
781  
782  
783  
784  
785  
786  
787  
788  
789  
790  
791  
792  
793  
794  
795  
796  
797  
798  
799  
800  
801  
802  
803  
804  
805  
806  
807  
808  
809  
810  
811  
812  
813  
814  
815  
816  
817  
818  
819  
820  
821  
822  
823  
824  
825  
826  
827  
828  
829  
830  
831  
832  
833  
834  
835  
836  
837  
838  
839  
840  
841  
842  
843  
844  
845  
846  
847  
848  
849  
850  
851  
852  
853  
854  
855  
856  
857  
858  
859  
860  
861  
862  
863  
864  
865  
866  
867  
868  
869  
870  
871  
872  
873  
874  
875  
876  
877  
878  
879  
880  
881  
882  
883  
884  
885  
886  
887  
888  
889  
890  
891  
892  
893  
894  
895  
896  
897  
898  
899  
900  
901  
902  
903  
904  
905  
906  
907  
908  
909  
910  
911  
912  
913  
914  
915  
916  
917  
918  
919  
920  
921  
922  
923  
924  
925  
926  
927  
928  
929  
930  
931  
932  
933  
934  
935  
936  
937  
938  
939  
940  
941  
942  
943  
944  
945  
946  
947  
948  
949  
950  
951  
952  
953  
954  
955  
956  
957  
958  
959  
960  
961  
962  
963  
964  
965  
966  
967  
968  
969  
970  
971  
972  
973  
974  
975  
976  
977  
978  
979  
980  
981  
982  
983  
984  
985  
986  
987  
988  
989  
990  
991  
992  
993  
994  
995  
996  
997  
998  
999  
1000

1  
2  
3 In conclusion, the combined exposure of freight train noise and vibration influenced HR during  
4 sleep, whereby HR amplitudes increase with increasing vibration level. This provoked  
5  
6 acceleration may affect cardiovascular functioning in long term [5 11] and could be a mechanism  
7  
8 explaining the previous findings of cardiovascular disease in persons exposed to traffic in general  
9  
10 [14-18] and rail traffic in particular [8]. To study the specific influence of vibration in contrast to  
11  
12 noise, further studies are required.  
13  
14  
15  
16  
17  
18  
19  
20  
21  
22  
23  
24  
25  
26  
27  
28  
29  
30  
31  
32  
33  
34  
35  
36  
37  
38  
39  
40  
41  
42  
43  
44  
45  
46  
47  
48  
49  
50  
51  
52  
53  
54  
55  
56  
57  
58  
59  
60

For peer review only

## References

1. EU. White Paper - European transport policy for 2010: time to decide. . Brussels: Commission of the European Communities, 2001.
2. Aasvang GM, Overland B, Ursin R, et al. A field study of effects of road traffic and railway noise on polysomnographic sleep parameters. *Journal of the Acoustical Society of America* 2011;129(6):3716-26 doi: Doi 10.1121/1.3583547[published Online First: Epub Date]].
3. Miedema HM, Vos H. Associations between self-reported sleep disturbance and environmental noise based on reanalyses of pooled data from 24 studies. *Behav Sleep Med* 2007;5(1):1-20 doi: 10.1207/s15402010bsm0501\_1[published Online First: Epub Date]].
4. Saremi M, Greneche J, Bonnefond A, et al. Effects of nocturnal railway noise on sleep fragmentation in young and middle-aged subjects as a function of type of train and sound level. *Int J Psychophysiol* 2008;70(3):184-91 doi: S0167-8760(08)00772-1 [pii] 10.1016/j.ijpsycho.2008.08.002[published Online First: Epub Date]].
5. Tassi P, Rohmer O, Schimchowitsch S, et al. Living alongside railway tracks: Long-term effects of nocturnal noise on sleep and cardiovascular reactivity as a function of age. *Environ Int* 2010;36(7):683-9 doi: S0160-4120(10)00087-5 [pii] 10.1016/j.envint.2010.05.001[published Online First: Epub Date]].
6. Öhrström E, Gidlöf-Gunnarsson A. Effects of railway noise and vibration in combination: field and laboratory studies. EURONOISE 2009. Edinburgh, Scotland, 2009.
7. Laugsand LE, Strand LB, Platou C, et al. Insomnia and the risk of incident heart failure: a population study. *Eur Heart J* 2013 doi: 10.1093/eurheartj/ehd019[published Online First: Epub Date]].
8. Eriksson C, Nilsson ME, Willers SM, et al. Traffic noise and cardiovascular health in Sweden: The roadside study. *Noise & Health* 2012;14(59):140-47 doi: Doi 10.4103/1463-1741.99864[published Online First: Epub Date]].
9. Gula LJ, Krahn AD, Skanes AC, et al. Clinical relevance of arrhythmias during sleep: guidance for clinicians. *Heart* 2004;90(3):347-52
10. Hord DJ, Lubin A, Johnson LC. The evoked heart rate response during sleep. *Psychophysiology* 1966;3(1):47-54
11. Griefahn B, Bröde P, Marks A, et al. Autonomic arousals related to traffic noise during sleep. *Sleep* 2008;31(4):569-77

- 1  
2  
3 12. Tassi P, Saremi M, Schimchowitsch S, et al. Cardiovascular responses to railway noise during sleep  
4 in young and middle-aged adults. *Eur J Appl Physiol* 2010;108(4):671-80 doi: 10.1007/s00421-  
5 009-1270-8[published Online First: Epub Date]].  
6  
7
- 8  
9 13. Di Nisi J, Muzet A, Ehrhart J, et al. Comparison of cardiovascular responses to noise during waking  
10 and sleeping in humans. *Sleep* 1990;13(2):108-20  
11
- 12  
13 14. Babisch W. Transportation noise and cardiovascular risk: updated review and synthesis of  
14 epidemiological studies indicate that the evidence has increased. *Noise Health* 2006;8(30):1-29  
15  
16
- 17 15. Babisch WF, Beule B, Schust M, et al. Traffic noise and risk of myocardial infarction. *Epidemiology*  
18 2005;16(1):33-40 doi: DOI 10.1097/01.ede.0000147104.84424.24[published Online First: Epub  
19 Date]].  
20  
21
- 22 16. Grazuleviciene R, Lekaviciute J, Mozgeris G, et al. Traffic noise emissions and myocardial infarction  
23 risk. *Pol J Environ Stud* 2004;13(6):737-41  
24  
25
- 26 17. Selander J, Nilsson ME, Bluhm G, et al. Long-term exposure to road traffic noise and myocardial  
27 infarction. *Epidemiology* 2009;20(2):272-9 doi: 10.1097/EDE.0b013e31819463bd[published  
28 Online First: Epub Date]].  
29  
30
- 31 18. Sorensen M, Andersen ZJ, Nordsborg RB, et al. Road traffic noise and incident myocardial  
32 infarction: a prospective cohort study. *PLoS One* 2012;7(6):e39283 doi:  
33 10.1371/journal.pone.0039283[published Online First: Epub Date]].  
34  
35
- 36 19. Basner M, Samel A. Effects of Nocturnal Aircraft Noise on Sleep Structure. *Somnologie* 2005;9:84-95  
37  
38
- 39 20. Passchier-Vermeer W. Night-time noise events and awakening. Delft The Netherlands: TNO Inro  
40 report, 2003.  
41  
42
- 43 21. Franssen E, van Dongen J, Ruysbroek J, et al. Hinder door milieufactoren en de beoordeling van de  
44 leefomgeving in Nederland Inventarisatie verstoringen 2003: TNO, 2004.  
45  
46
- 47 22. Meier-Ewert HK, Ridker PM, Rifai N, et al. Effect of sleep loss on C-reactive protein, an  
48 inflammatory marker of cardiovascular risk. *J Am Coll Cardiol* 2004;43(4):678-83 doi:  
49 10.1016/j.jacc.2003.07.050[published Online First: Epub Date]].  
50  
51
- 52 23. Babisch W. The Noise/Stress Concept, Risk Assessment and Research Needs. *Noise & health*  
53 2002;4(16):1-11  
54  
55
- 56 24. Carter NL, Ingham P, Tran K, et al. A Field-Study of the Effects of Traffic Noise on Heart-Rate and  
57 Cardiac-Arrhythmia during Sleep. *Journal of Sound and Vibration* 1994;169(2):211-27  
58  
59  
60



- 1  
2  
3  
4  
5  
6  
7  
8  
9  
10  
11  
12  
13  
14  
15  
16  
17  
18  
19  
20  
21  
22  
23  
24  
25  
26  
27  
28  
29  
30  
31  
32  
33  
34  
35  
36  
37  
38  
39  
40  
41  
42  
43  
44  
45  
46  
47  
48  
49  
50  
51  
52  
53  
54  
55  
56  
57  
58  
59  
60
25. Findeis H, Peters E. Disturbing effects of low frequency sound immissions and vibrations in residential buildings. *Noise Health* 2004;6(23):29-35
  26. Gidlof-Gunnarsson A, Ogren M, Jerson T, et al. Railway noise annoyance and the importance of number of trains, ground vibration, and building situational factors. *Noise & Health* 2012;14(59):190-201 doi: Doi 10.4103/1463-1741.99895[published Online First: Epub Date]].
  27. Howarth HVC, Griffin MJ. The Annoyance Caused by Simultaneous Noise and Vibration from Railways. *Journal of the Acoustical Society of America* 1991;89(5):2317-23
  28. Kiuchi M, Nagata N, Ikeno S, et al. The relationship between the response to external light stimulation and behavioral states in the human fetus: how it differs from vibroacoustic stimulation. *Early Hum Dev* 2000;58(2):153-65
  29. Bjor B, Burstrom L, Eriksson K, et al. Mortality from myocardial infarction in relation to exposure to vibration and dust among a cohort of iron-ore miners in Sweden. *Occup Environ Med* 2010;67(3):154-8 doi: 10.1136/oem.2009.046599[published Online First: Epub Date]].
  30. Bjor B, Burstrom L, Nilsson T, et al. Vibration exposure and myocardial infarction incidence: the VHEEP case-control study. *Occup Med (Lond)* 2006;56(5):338-44 doi: 10.1093/occmed/kql024[published Online First: Epub Date]].
  31. WHO. Obesity: Preventing and managing the global epidemic: Report of a WHO consultation. Geneva: World Health Organisation, 2000.
  32. Smith M, Croy I, Ögren I, et al. On the Influence of Freight Trains on Humans: A Laboratory Investigation of the Impact of Nocturnal Low Frequency Vibration and Noise on Sleep and Heart Rate. submitted
  33. Iber C, Ancoli-Israel S, Chesson A, et al. *The AASM Manual for the Scoring of Sleep and Associated Events; Rules, Terminology and Technical Specifications*. 1 ed. Westchester, IL: American Academy of Sleep Medicine, 2007.
  34. Basner M, Muller U, Elmenhorst EM. Single and combined effects of air, road, and rail traffic noise on sleep and recuperation. *Sleep* 2011;34(1):11-23
  35. Basner M, Mueller U, Elmenhorst EM, et al. A systematic comparison of aircraft noise induced EEG awakenings and automatically detected cardiac arousals. *internoise 2009*. Ottawa, Canada, 2009.
  36. Keefe FB, Johnson LC, Hunter EJ. EEG and autonomic response pattern during waking and sleep stages. *Psychophysiology* 1971;8(2):198-212

- 1  
2  
3 37. Sforza E, Jouny C, Ibanez V. Cardiac activation during arousal in humans: further evidence for  
4 hierarchy in the arousal response. *Clinical neurophysiology : official journal of the*  
5 *International Federation of Clinical Neurophysiology* 2000;111(9):1611-9  
6  
7  
8  
9 38. Guilleminault C, Abad VC, Stoohs R. Effects of CNS activation on arousal and the autonomic  
10 nervous system. *Neurology* 2004;62(7):A6-A6  
11  
12  
13 39. Halasz P. Arousals without awakening--dynamic aspect of sleep. *Physiol Behav* 1993;54(4):795-802  
14  
15  
16 40. Kohler M, Stradling JR. Mechanisms of vascular damage in obstructive sleep apnea. *Nat Rev*  
17 *Cardiol* 2010;7(12):677-85 doi: 10.1038/nrcardio.2010.145[published Online First: Epub  
18 Date]].  
19  
20  
21 41. Aasvang GM, Moum T, Engdahl B. Self-reported sleep disturbances due to railway noise: exposure-  
22 response relationships for nighttime equivalent and maximum noise levels. *J Acoust Soc Am*  
23 2008;124(1):257-68 doi: 10.1121/1.2932074[published Online First: Epub Date]].  
24  
25  
26  
27  
28  
29  
30  
31  
32  
33  
34  
35  
36  
37  
38  
39  
40  
41  
42  
43  
44  
45  
46  
47  
48  
49  
50  
51  
52  
53  
54  
55  
56  
57  
58  
59  
60

## Tables

**TABLE 1:** *Vibration and noise parameters applied to individual trains.*

| Train | Nr of passages per night |                 | Noise exposure |                  |                |                     | Vibration exposure (same for all trains) |                                              |
|-------|--------------------------|-----------------|----------------|------------------|----------------|---------------------|------------------------------------------|----------------------------------------------|
|       | 20 trains/night          | 36 trains/night | $L_{Aeq}$ (dB) | $L_{AFmax}$ (dB) | $t > 35dB$ (s) | $T_{10\%-90\%}$ (s) | Unweighted acceleration ( $m/s^2$ rms)   | $W_d$ Weighted peak acceleration ( $m/s^2$ ) |
| 1     | 4                        | 8               | 44.0           | 48.4             | 11.5           | 8.9                 |                                          |                                              |
| 2     | 5                        | 8               | 42.7           | 47.2             | 46.2           | 9.8                 | High = 0.072                             | High = 0.0204                                |
| 3     | 4                        | 8               | 44.5           | 49.8             | 23.7           | 8.4                 | Low = 0.036                              | Low = 0.0102                                 |
| 4     | 5                        | 8               | 45.6           | 49.8             | 29.2           | 7.9                 |                                          |                                              |
| 5     | 2                        | 4               | 42.4           | 47.2             | 56.9           | 9.2                 |                                          |                                              |

*The vibration acceleration is reported according to the ISO 2631-1 standard.*

For peer review only

**TABLE 2:** Analysis of event related HR response for each of the four exposure nights and combined for low and high vibration exposure.

|                                                          |          | Low vibration           |                         | High vibration          |                         |
|----------------------------------------------------------|----------|-------------------------|-------------------------|-------------------------|-------------------------|
|                                                          |          | 20 trains/night<br>N=24 | 36 trains/night<br>N=23 | 20 trains/night<br>N=23 | 36 trains/night<br>N=24 |
|                                                          |          | Mean (SD)               | Mean (SD)               | Mean (SD)               | Mean (SD)               |
| HR AuC                                                   | train    | 41.7 (114.5)            | 77.2 (103.0)            | 19.4 (77.6)             | 52.3 (86.8)             |
|                                                          | fake     | -4.6 (83.7)             | 0.2 (54.4)              | -7.4 (51.5)             | 2.2 (60.9)              |
| Number of event related awakenings per night             | train    | 3.3 (2.3)               | 4.2 (2.6)               | 5.2 (3.2)               | 5.6 (3.4)               |
|                                                          | fake     | 1.5 (0.7)               | 1.5 (0.6)               | 1.2 (0.4)               | 1.8 (0.8)               |
| number of participants (percentage of sample population) |          |                         |                         |                         |                         |
| Event-related HR change of at least 3bpm                 | train    | 15 (62.5%)              | 17 (73.9%)              | 13 (54.2%)              | 19 (79.2%)              |
|                                                          | fake     | 9 (37.5%)               | 8 (34.8%)               | 4 (16.7%)               | 4 (16.7%)               |
|                                                          |          | low vibration           |                         | high vibration          |                         |
| AuC                                                      | train    | Mean (SD)               |                         | Mean (SD)               |                         |
|                                                          |          | 21.2 (81.8)             |                         | 62.3 (81.4)             |                         |
| Initial response                                         | train    | 1.6(1.8)                |                         | 2.3 (2.0)               |                         |
|                                                          | fake     | 0.7 (0.9)               |                         | 0.7 (1.0)               |                         |
| Delayed response                                         | train    | 2.6 (2.4)               |                         | 3.7 (2.8)               |                         |
|                                                          | fake     | 1.1 (1.0)               |                         | 1.3(0.9)                |                         |
| Sleep stage related (train events only)                  |          |                         |                         |                         |                         |
| AuC                                                      | stage N3 | 25.1 (166.9)            |                         | 79.7 (114.8)            |                         |
|                                                          | stage N2 | 30.2 (95.8)             |                         | 53.2 (90.3)             |                         |
|                                                          | REM      | 42.6 (162.4)            |                         | 113.0 (203.1)           |                         |
| Initial response                                         | stage N3 | 2.3 (2.7)               |                         | 3.7 (4.0)               |                         |
|                                                          | stage N2 | 2.1 (2.2)               |                         | 2.2 (1.9)               |                         |
|                                                          | REM      | 2.8 (2.8)               |                         | 4.7 (3.3)               |                         |
| Delayed response                                         | stage N3 | 4.5 (4.9)               |                         | 5.9 (4.1)               |                         |
|                                                          | stage N2 | 3.6 (3.6)               |                         | 4.5 (3.4)               |                         |
|                                                          | REM      | 5.6 (4.1)               |                         | 7.5 (5.8)               |                         |

Area under the curve (AuC), number of event related awakenings, initial and delayed maximal increase of heart rate (HR) and number of participants with an event related change of HR of at least 3bpm are presented for each of the four experimental nights. AuC, initial and delayed maximal increase of HR are presented for the combined low and high vibration condition. Cave:

1  
2  
3 *the initial and delayed response is calculated as maximal increase within the first 10 to 15 or 20*  
4 *to 48 seconds after train onset. This difference in search area explains partly the differences*  
5 *between the initial and delayed increase of HR.*  
6  
7  
8  
9  
10  
11  
12  
13  
14  
15  
16  
17  
18  
19  
20  
21  
22  
23  
24  
25  
26  
27  
28  
29  
30  
31  
32  
33  
34  
35  
36  
37  
38  
39  
40  
41  
42  
43  
44  
45  
46  
47  
48  
49  
50  
51  
52  
53  
54  
55  
56  
57  
58  
59  
60

For peer review only

**TABLE 3:** Train related HR characteristics in relation to gender and noise sensitivity of the participants.

|                   |                    |                  | Low vibration | High vibration |
|-------------------|--------------------|------------------|---------------|----------------|
|                   |                    |                  | Mean (SD)     | Mean (SD)      |
| Gender            | Men N=11           | AuC              | 48.1 (73.0)   | 81.2 (96.8)    |
|                   |                    | Initial response | 1.7 (1.4)     | 2.0 (1.9)      |
|                   |                    | Delayed response | 3.5 (2.8)     | 4.8 (3.7)      |
|                   | Women N=13         | AuC              | -1.6 (84.6)   | 46.2 (65.4)    |
|                   |                    | Initial response | 1.5 (2.1)     | 2.6 (2.2)      |
|                   |                    | Delayed response | 1.8 (1.7)     | 2.8 (1.5)      |
| Noise sensitivity | Non sensitive N=14 | AuC              | 24.0 (62.0)   | 63.8 (93.3)    |
|                   |                    | Initial response | 1.1 (1.3)     | 2.0 (2.0)      |
|                   |                    | Delayed response | 2.3 (2.0)     | 4.0 (3.4)      |
|                   | Sensitive N=10     | AuC              | 17.2 (107.3)  | 60.1 (65.9)    |
|                   |                    | Initial response | 2.4 (2.2)     | 2.8 (2.1)      |
|                   |                    | Delayed response | 3.0 (2.9)     | 3.4 (2.0)      |

## Figure Legends

*FIGURE 1. Visualization of the analytical procedure. For each of the four experimental nights, HR data is taken out for each of the train-events (black lines of the events per night) for each participant. Data is checked for artifacts and wake stage and then sampled into one average HR response for each participant with corresponding initial maximum, delayed maximum and area under the curve parameters. The grand average is built over all of the participants. The very same procedure is applied to the fake events (grey lines of the events per night).*

*FIGURE 2. A) Averaged HR response following the train events and fake events, respectively, in the low and high vibration exposure. In figure 1A, a clear HR increase after train events can be seen, while HR stays at baseline for fake events. The HR response can be divided into two components. An initial response occurring around 10 to 15 seconds after train onset and a delayed response occurring about 17 to 48 sec after train onset. The delayed response is significantly enhanced in the high vs. low vibration exposure. In figure 1B the averaged HR reaction in the high vibration condition is visualized for each of the five different train types. Although the different number of trains does not allow direct comparison, it can be seen, that in principal the same characteristics of the HR reaction is apparent for each train.*

For peer review only
